# Supplementary material
Source: PubMed Central journal article supplement (PMC9110171)
Supplement: NIHMS1800650-supplement-1.pdf [file NIHMS1800650-supplement-1.pdf]

**Figure S1**

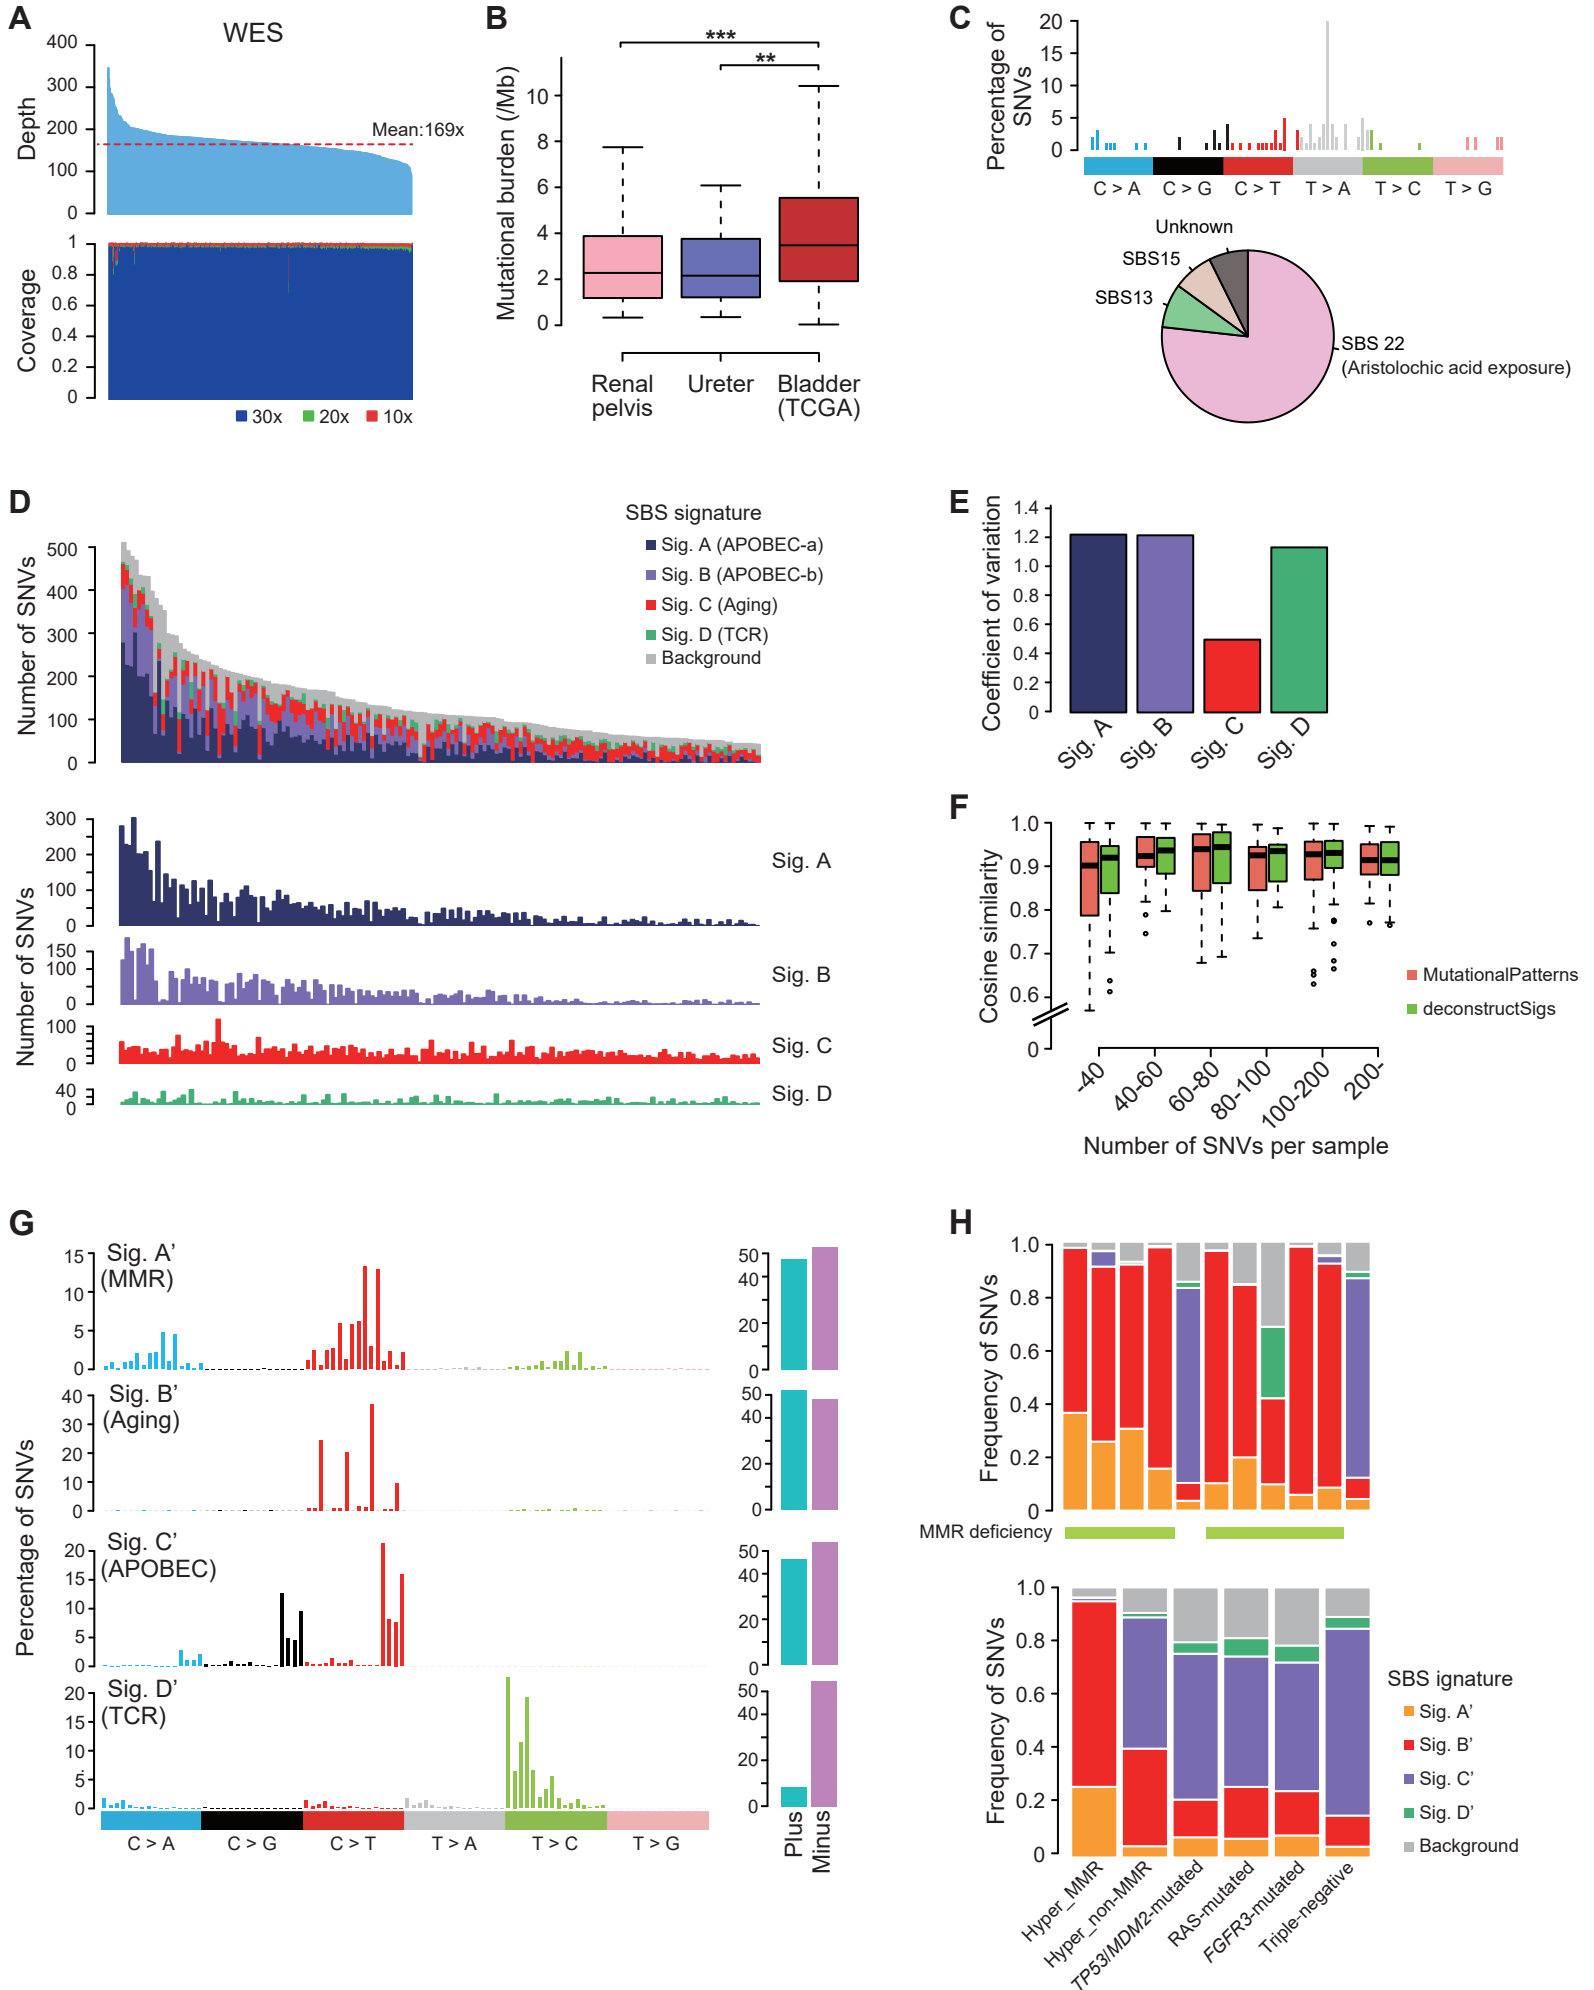

**Figure S1, Related to Figure 1. Mutational burden and single base substitution signatures in UTUC.**

**(A)** Bar plots showing depth (top) and coverage (bottom) of whole exome sequencing (WES).

**(B)** Box plots showing mutational burdens of cancers in renal pelvis (pink), ureter (purple), and bladder (red, TCGA cohort). *P* values calculated by two-sided Mann-Whitney *U* test with Bonferroni correction. The median, first and third quartiles, as well as outliers, are indicated with whiskers extending to the furthest value within 1.5 of the interquartile range in box plots. **\*\**P* < 0.01, \*\*\**P* < 0.001.**

**(C)** The mutational signature in UTUC98T, which is associated with SBS22.

**(D)** Bar plots showing the numbers of SNVs affected by Sig. A-D.

**(E)** Bar plots showing the coefficients of variations in each SBS signature.

**(F)** Box plots showing cosine similarity of four SBS signatures contributions between 'pmsignature' and 'MutationalPatterns' (orange) or 'deconstructSigs' (green). The median, first and third quartiles, as well as outliers, are indicated with whiskers extending to the furthest value within 1.5 of the interquartile range in box plots.

**(G)** Four predominant SBS signatures (Sig. A' -D' , left) and the strand bias for each signature (right) extracted from all UTUC samples, including hypermutated ones. TCR, transcriptional-coupled repair.

**(H)** Bar plots showing the frequency of each SBS signature in hypermutated samples (top) and in each mutational subtype (bottom). Hypermutated samples are further divided into two subgroups according to the status of defect in MMR genes in the bottom panel.

SNVs, single nucleotide variants; SBS, single base substitution; MMR, mismatch repair.

**Table S2, related to Figure 1. Mismatch repair gene alterations in hypermutated samples.**

| Sample ID | SNV  | Indel | Mismatch repair gene alterations |                                                |
|-----------|------|-------|----------------------------------|------------------------------------------------|
|           |      |       | Germline                         | Somatic                                        |
| UTUC185T  | 9038 | 183   | <i>MSH6</i> _p.M1326fs           | <i>MSH6</i> _p.P831fs                          |
| UTUC221T  | 3933 | 46    | <i>MSH6</i> _p.Y214X             | <i>MSH6</i> _p.T1085fs                         |
| UTUC252T  | 2194 | 573   | <i>MSH2</i> _p.L173P             | <i>MSH2</i> _p.L187P                           |
| UTUC62T   | 2129 | 22    | <i>MSH6</i> _p.T1085fs           | <i>MSH6</i> _p.E434X                           |
| UTUC204T  | 1522 | 34    | —                                | —                                              |
| UTUC229rt | 1474 | 35    | <i>MSH6</i> _p.S602fs            | <i>MSH6</i> _p.T336fs                          |
| UTUC282T  | 1073 | 328   | —                                | <i>MLH1</i> _p.I330fs<br><i>MLH1</i> _p.S372fs |
| UTUC89T   | 1179 | 147   | —                                | <i>MSH2</i> _p.Q76X                            |
| UTUC166T  | 1182 | 140   | <i>MSH2</i> _p.G220fs            | <i>MSH2</i> _c.645+1G>A                        |
| UTUC157T  | 1293 | 10    | <i>MSH6</i> _c.3646+1G>C         | <i>MSH6</i> _p.C687fs                          |
| UTUC175T  | 771  | 35    | —                                | —                                              |

SNV, Single nucleotide variant.

**Table S3, related to Figure 2. Driver genes identified by MutSigCV and dNdScv analysis.**

**MutSigCV**

| Gene    | Type of mutations (Number) |        | P-value  | q value  |
|---------|----------------------------|--------|----------|----------|
|         | Nonsilent                  | Silent |          |          |
| ARID1A  | 31                         | 5      | 2.20E-16 | 2.20E-16 |
| CDKN1A  | 14                         | 0      | 2.20E-16 | 2.20E-16 |
| ELF3    | 27                         | 0      | 2.20E-16 | 2.20E-16 |
| HRAS    | 27                         | 0      | 2.20E-16 | 2.20E-16 |
| KDM6A   | 47                         | 0      | 2.20E-16 | 2.20E-16 |
| STAG2   | 24                         | 3      | 2.20E-16 | 2.20E-16 |
| TP53    | 73                         | 1      | 2.20E-16 | 2.20E-16 |
| KMT2D   | 132                        | 5      | 1.55E-15 | 3.66E-12 |
| ZFP36L1 | 11                         | 1      | 5.65E-13 | 1.18E-09 |
| CREBBP  | 21                         | 1      | 8.85E-13 | 1.67E-09 |
| TSC1    | 14                         | 0      | 2.45E-06 | 4.19E-03 |
| AMMECR1 | 6                          | 0      | 6.36E-06 | 1.00E-02 |
| FOXQ1   | 6                          | 0      | 1.70E-05 | 2.32E-02 |
| EP300   | 26                         | 1      | 1.72E-05 | 2.32E-02 |
| KMT2C   | 33                         | 1      | 2.68E-05 | 3.31E-02 |
| RHOB    | 9                          | 0      | 2.81E-05 | 3.31E-02 |
| CUL3    | 10                         | 0      | 4.11E-05 | 0.045606 |
| KRAS    | 7                          | 0      | 6.95E-05 | 7.29E-02 |

**dNdScv**

| Gene    | Type of mutations (Number) |          |          |          |       | P-value  | q value  |
|---------|----------------------------|----------|----------|----------|-------|----------|----------|
|         | Synonymous                 | Missense | Nonsense | Splicing | Indel |          |          |
| TP53    | 1                          | 55       | 9        | 4        | 4     | 2.20E-16 | 2.20E-16 |
| FGFR3   | 4                          | 70       | 0        | 0        | 0     | 2.20E-16 | 2.20E-16 |
| HRAS    | 0                          | 25       | 0        | 0        | 3     | 2.20E-16 | 2.20E-16 |
| KMT2D   | 5                          | 22       | 49       | 5        | 54    | 2.20E-16 | 2.20E-16 |
| KDM6A   | 0                          | 3        | 20       | 4        | 19    | 2.20E-16 | 2.20E-16 |
| STAG2   | 3                          | 2        | 12       | 1        | 9     | 2.20E-16 | 2.20E-16 |
| CDKN1A  | 0                          | 0        | 0        | 0        | 13    | 6.66E-16 | 1.91E-12 |
| PIK3CA  | 0                          | 27       | 0        | 0        | 0     | 8.22E-15 | 2.06E-11 |
| ARID1A  | 5                          | 8        | 8        | 2        | 12    | 1.32E-14 | 2.95E-11 |
| ELF3    | 1                          | 5        | 1        | 1        | 19    | 1.75E-14 | 3.52E-11 |
| ZFP36L1 | 1                          | 1        | 0        | 0        | 10    | 1.56E-10 | 2.85E-07 |
| CREBBP  | 2                          | 7        | 8        | 0        | 7     | 1.97E-10 | 3.30E-07 |
| KMT2C   | 1                          | 8        | 7        | 1        | 17    | 7.55E-09 | 1.17E-05 |
| RHOB    | 0                          | 7        | 0        | 0        | 2     | 1.19E-08 | 1.71E-05 |
| EP300   | 1                          | 12       | 2        | 1        | 11    | 5.39E-08 | 7.22E-05 |
| KMT2A   | 1                          | 3        | 6        | 0        | 5     | 3.02E-07 | 3.79E-04 |
| TSC1    | 1                          | 6        | 4        | 0        | 4     | 6.33E-07 | 7.48E-04 |
| RHOA    | 0                          | 7        | 0        | 0        | 0     | 2.61E-06 | 2.91E-03 |
| FBXW7   | 0                          | 9        | 1        | 0        | 1     | 4.15E-06 | 4.39E-03 |
| KRAS    | 0                          | 7        | 0        | 0        | 0     | 7.94E-06 | 7.98E-03 |
| ERCC2   | 1                          | 11       | 1        | 0        | 0     | 1.69E-05 | 1.62E-02 |
| SPTAN1  | 0                          | 4        | 5        | 0        | 3     | 4.12E-05 | 3.76E-02 |
| CUL3    | 0                          | 7        | 0        | 2        | 1     | 5.37E-05 | 4.69E-02 |
| DDX17   | 2                          | 8        | 1        | 0        | 2     | 5.65E-05 | 4.73E-02 |



**Table S4, related to Figure 2. *TERT* promoter mutation detection.**

| Sample ID | Chr | Start   | End     | Ref | Alt | Method | Variant allele frequency |        |
|-----------|-----|---------|---------|-----|-----|--------|--------------------------|--------|
|           |     |         |         |     |     |        | Tumour                   | Normal |
| UTUC101T  | 5   | 1295228 | 1295228 | G   | A   | PCR    | 0.065                    | 0.000  |
| UTUC112T  | 5   | 1295228 | 1295228 | G   | A   | PCR    | 0.527                    | 0.011  |
| UTUC113T  | 5   | 1295228 | 1295228 | G   | A   | PCR    | 0.344                    | 0.000  |
| UTUC115T  | 5   | 1295228 | 1295228 | G   | A   | PCR    | 0.593                    | 0.000  |
| UTUC122T  | 5   | 1295228 | 1295228 | G   | A   | PCR    | 0.314                    | 0.000  |
| UTUC123T  | 5   | 1295242 | 1295243 | GG  | AA  | PCR    | 0.199                    | 0.000  |
| UTUC127T  | 5   | 1295250 | 1295250 | G   | A   | PCR    | 0.588                    | 0.124  |
| UTUC12T   | 5   | 1295228 | 1295228 | G   | A   | PCR    | 0.448                    | 0.000  |
| UTUC132T  | 5   | 1295228 | 1295228 | G   | A   | PCR    | 0.475                    | 0.000  |
| UTUC133T  | 5   | 1295250 | 1295250 | G   | A   | PCR    | 0.455                    | 0.000  |
| UTUC136T  | 5   | 1295228 | 1295228 | G   | A   | PCR    | 0.333                    | 0.000  |
| UTUC13T   | 5   | 1295228 | 1295228 | G   | A   | PCR    | 0.284                    | 0.000  |
| UTUC141T  | 5   | 1295228 | 1295228 | G   | A   | PCR    | 0.170                    | 0.000  |
| UTUC142T  | 5   | 1295228 | 1295228 | G   | A   | PCR    | 0.366                    | 0.003  |
| UTUC146T  | 5   | 1295228 | 1295228 | G   | A   | PCR    | 0.408                    | 0.000  |
| UTUC148T  | 5   | 1295228 | 1295228 | G   | A   | PCR    | 0.663                    | 0.000  |
| UTUC152T  | 5   | 1295228 | 1295228 | G   | A   | PCR    | 0.656                    | 0.000  |
| UTUC153T  | 5   | 1295228 | 1295228 | G   | T   | PCR    | 0.351                    | 0.000  |
| UTUC159T  | 5   | 1295228 | 1295228 | G   | A   | PCR    | 0.359                    | 0.010  |
| UTUC160T  | 5   | 1295228 | 1295228 | G   | A   | PCR    | 0.377                    | 0.000  |
| UTUC161T  | 5   | 1295228 | 1295228 | G   | A   | PCR    | 0.422                    | 0.022  |
| UTUC162T  | 5   | 1295228 | 1295228 | G   | A   | PCR    | 0.470                    | 0.000  |
| UTUC163T  | 5   | 1295228 | 1295228 | G   | A   | PCR    | 0.497                    | 0.000  |
| UTUC171T  | 5   | 1295228 | 1295228 | G   | A   | PCR    | 0.593                    | 0.000  |
| UTUC172T  | 5   | 1295228 | 1295228 | G   | A   | PCR    | 0.117                    | 0.000  |
| UTUC173T  | 5   | 1295228 | 1295228 | G   | A   | PCR    | 0.452                    | 0.000  |
| UTUC178T  | 5   | 1295250 | 1295250 | G   | A   | PCR    | 0.086                    | 0.000  |
| UTUC179T  | 5   | 1295228 | 1295228 | G   | A   | PCR    | 0.353                    | 0.000  |
| UTUC182T  | 5   | 1295250 | 1295250 | G   | A   | PCR    | 0.500                    | 0.011  |
| UTUC183T  | 5   | 1295228 | 1295228 | G   | A   | PCR    | 0.217                    | 0.015  |
| UTUC189T  | 5   | 1295228 | 1295228 | G   | A   | PCR    | 0.552                    | 0.014  |
| UTUC18T   | 5   | 1295228 | 1295228 | G   | A   | PCR    | 0.502                    | 0.009  |
| UTUC190T  | 5   | 1295228 | 1295228 | G   | A   | PCR    | 0.211                    | 0.000  |
| UTUC191T  | 5   | 1295228 | 1295228 | G   | A   | PCR    | 0.383                    | 0.000  |
| UTUC192T  | 5   | 1295228 | 1295228 | G   | A   | PCR    | 0.302                    | 0.000  |
| UTUC205T  | 5   | 1295228 | 1295228 | G   | A   | PCR    | 0.231                    | 0.000  |
| UTUC206T  | 5   | 1295228 | 1295228 | G   | A   | PCR    | 0.546                    | 0.000  |
| UTUC207T  | 5   | 1295228 | 1295228 | G   | A   | PCR    | 0.529                    | 0.000  |
| UTUC208T  | 5   | 1295228 | 1295228 | G   | A   | PCR    | 0.357                    | 0.000  |
| UTUC211T  | 5   | 1295228 | 1295228 | G   | A   | PCR    | 0.563                    | 0.041  |
| UTUC212T  | 5   | 1295228 | 1295228 | G   | A   | PCR    | 0.542                    | 0.000  |
| UTUC213T  | 5   | 1295228 | 1295228 | G   | A   | PCR    | 0.524                    | 0.029  |
| UTUC215T  | 5   | 1295228 | 1295228 | G   | A   | PCR    | 0.520                    | 0.000  |
| UTUC217T  | 5   | 1295228 | 1295228 | G   | A   | PCR    | 0.557                    | 0.000  |
| UTUC218T  | 5   | 1295228 | 1295228 | G   | A   | PCR    | 0.729                    | 0.000  |
| UTUC222T  | 5   | 1295228 | 1295228 | G   | A   | PCR    | 0.201                    | 0.000  |
| UTUC224T  | 5   | 1295228 | 1295228 | G   | A   | PCR    | 0.437                    | 0.000  |
| UTUC227T  | 5   | 1295228 | 1295228 | G   | A   | PCR    | 0.559                    | 0.000  |

|          |   |         |         |    |    |            |       |       |
|----------|---|---------|---------|----|----|------------|-------|-------|
| UTUC231T | 5 | 1295228 | 1295228 | G  | A  | PCR        | 0.651 | 0.000 |
| UTUC233T | 5 | 1295250 | 1295250 | G  | A  | PCR        | 0.434 | 0.000 |
| UTUC234T | 5 | 1295228 | 1295228 | G  | A  | PCR        | 0.570 | 0.000 |
| UTUC236T | 5 | 1295228 | 1295228 | G  | A  | PCR        | 0.786 | 0.000 |
| UTUC239T | 5 | 1295228 | 1295228 | G  | A  | PCR        | 0.530 | 0.000 |
| UTUC247T | 5 | 1295228 | 1295228 | G  | A  | PCR/Sanger | 0.378 | 0.000 |
| UTUC248T | 5 | 1295228 | 1295228 | G  | A  | PCR        | 0.551 | 0.000 |
| UTUC24T  | 5 | 1295228 | 1295228 | G  | A  | PCR        | 0.523 | 0.000 |
| UTUC251T | 5 | 1295228 | 1295228 | G  | A  | PCR        | 0.482 | 0.000 |
| UTUC254T | 5 | 1295228 | 1295228 | G  | A  | PCR        | 0.094 | 0.000 |
| UTUC255T | 5 | 1295228 | 1295228 | G  | A  | PCR        | 0.616 | 0.000 |
| UTUC262T | 5 | 1295228 | 1295228 | G  | A  | PCR        | 0.495 | 0.000 |
| UTUC265T | 5 | 1295228 | 1295228 | G  | A  | PCR        | 0.598 | 0.000 |
| UTUC266T | 5 | 1295228 | 1295228 | G  | A  | PCR        | 0.661 | 0.000 |
| UTUC268T | 5 | 1295228 | 1295228 | G  | A  | PCR        | 0.572 | 0.000 |
| UTUC269T | 5 | 1295228 | 1295228 | G  | A  | PCR        | 0.547 | 0.000 |
| UTUC270T | 5 | 1295228 | 1295228 | G  | A  | PCR        | 0.559 | 0.000 |
| UTUC277T | 5 | 1295228 | 1295228 | G  | A  | PCR/Sanger | 0.694 | 0.000 |
| UTUC27T  | 5 | 1295228 | 1295228 | G  | A  | PCR        | 0.514 | 0.000 |
| UTUC280T | 5 | 1295228 | 1295228 | G  | A  | PCR/Sanger | 0.599 | 0.000 |
| UTUC282T | 5 | 1295228 | 1295228 | G  | A  | PCR/Sanger | 0.573 | 0.000 |
| UTUC284T | 5 | 1295228 | 1295228 | G  | A  | PCR/Sanger | 0.585 | 0.000 |
| UTUC285T | 5 | 1295228 | 1295228 | G  | A  | PCR/Sanger | 0.657 | 0.000 |
| UTUC286T | 5 | 1295228 | 1295228 | G  | A  | Sanger     | -     | -     |
| UTUC287T | 5 | 1295228 | 1295228 | G  | A  | Sanger     | -     | -     |
| UTUC288T | 5 | 1295228 | 1295228 | G  | A  | PCR/Sanger | 0.594 | 0.000 |
| UTUC289T | 5 | 1295228 | 1295228 | G  | A  | PCR/Sanger | 0.600 | 0.000 |
| UTUC291T | 5 | 1295228 | 1295228 | G  | A  | PCR/Sanger | 0.616 | 0.000 |
| UTUC29T  | 5 | 1295228 | 1295228 | G  | A  | PCR        | 0.474 | 0.023 |
| UTUC30T  | 5 | 1295228 | 1295228 | G  | A  | PCR        | 0.331 | 0.000 |
| UTUC31T  | 5 | 1295228 | 1295228 | G  | A  | PCR        | 0.433 | 0.002 |
| UTUC42T  | 5 | 1295250 | 1295250 | G  | A  | PCR        | 0.411 | 0.000 |
| UTUC43T  | 5 | 1295228 | 1295228 | G  | A  | PCR        | 0.595 | 0.010 |
| UTUC48T  | 5 | 1295228 | 1295228 | G  | A  | PCR        | 0.193 | 0.000 |
| UTUC4T   | 5 | 1295228 | 1295228 | G  | A  | PCR        | 0.612 | 0.367 |
| UTUC51T  | 5 | 1295228 | 1295228 | G  | A  | PCR        | 0.485 | 0.027 |
| UTUC55T  | 5 | 1295228 | 1295228 | G  | A  | PCR        | 0.408 | 0.000 |
| UTUC56T  | 5 | 1295242 | 1295243 | GG | AA | PCR        | 0.415 | 0.039 |
| UTUC59T  | 5 | 1295250 | 1295250 | G  | A  | PCR        | 0.162 | 0.000 |
| UTUC5T   | 5 | 1295250 | 1295250 | G  | A  | PCR        | 0.535 | 0.000 |
| UTUC60T  | 5 | 1295250 | 1295250 | G  | A  | PCR        | 0.199 | 0.000 |
| UTUC61T  | 5 | 1295228 | 1295228 | G  | A  | PCR        | 0.563 | 0.000 |
| UTUC66T  | 5 | 1295228 | 1295228 | G  | A  | PCR        | 0.225 | 0.000 |
| UTUC68T  | 5 | 1295228 | 1295228 | G  | A  | PCR        | 0.427 | 0.000 |
| UTUC71T  | 5 | 1295228 | 1295228 | G  | A  | PCR        | 0.173 | 0.000 |
| UTUC73T  | 5 | 1295250 | 1295250 | G  | A  | PCR        | 0.524 | 0.000 |
| UTUC78T  | 5 | 1295250 | 1295250 | G  | A  | PCR        | 0.599 | 0.000 |
| UTUC7T   | 5 | 1295250 | 1295250 | G  | A  | PCR        | 0.408 | 0.000 |
| UTUC80T  | 5 | 1295228 | 1295228 | G  | A  | PCR        | 0.548 | 0.000 |
| UTUC83T  | 5 | 1295250 | 1295250 | G  | A  | PCR        | 0.307 | 0.000 |
| UTUC8T   | 5 | 1295228 | 1295228 | G  | A  | PCR        | 0.569 | 0.000 |
| UTUC90T  | 5 | 1295228 | 1295228 | G  | A  | PCR        | 0.364 | 0.012 |

|         |   |         |         |   |   |     |       |       |
|---------|---|---------|---------|---|---|-----|-------|-------|
| UTUC92T | 5 | 1295228 | 1295228 | G | A | PCR | 0.208 | 0.000 |
| UTUC95T | 5 | 1295228 | 1295228 | G | A | PCR | 0.131 | 0.000 |

---

Chr, chromosome; PCR, PCR-based deep sequencing; Sanger, Sanger sequencing.

**Figure S2**

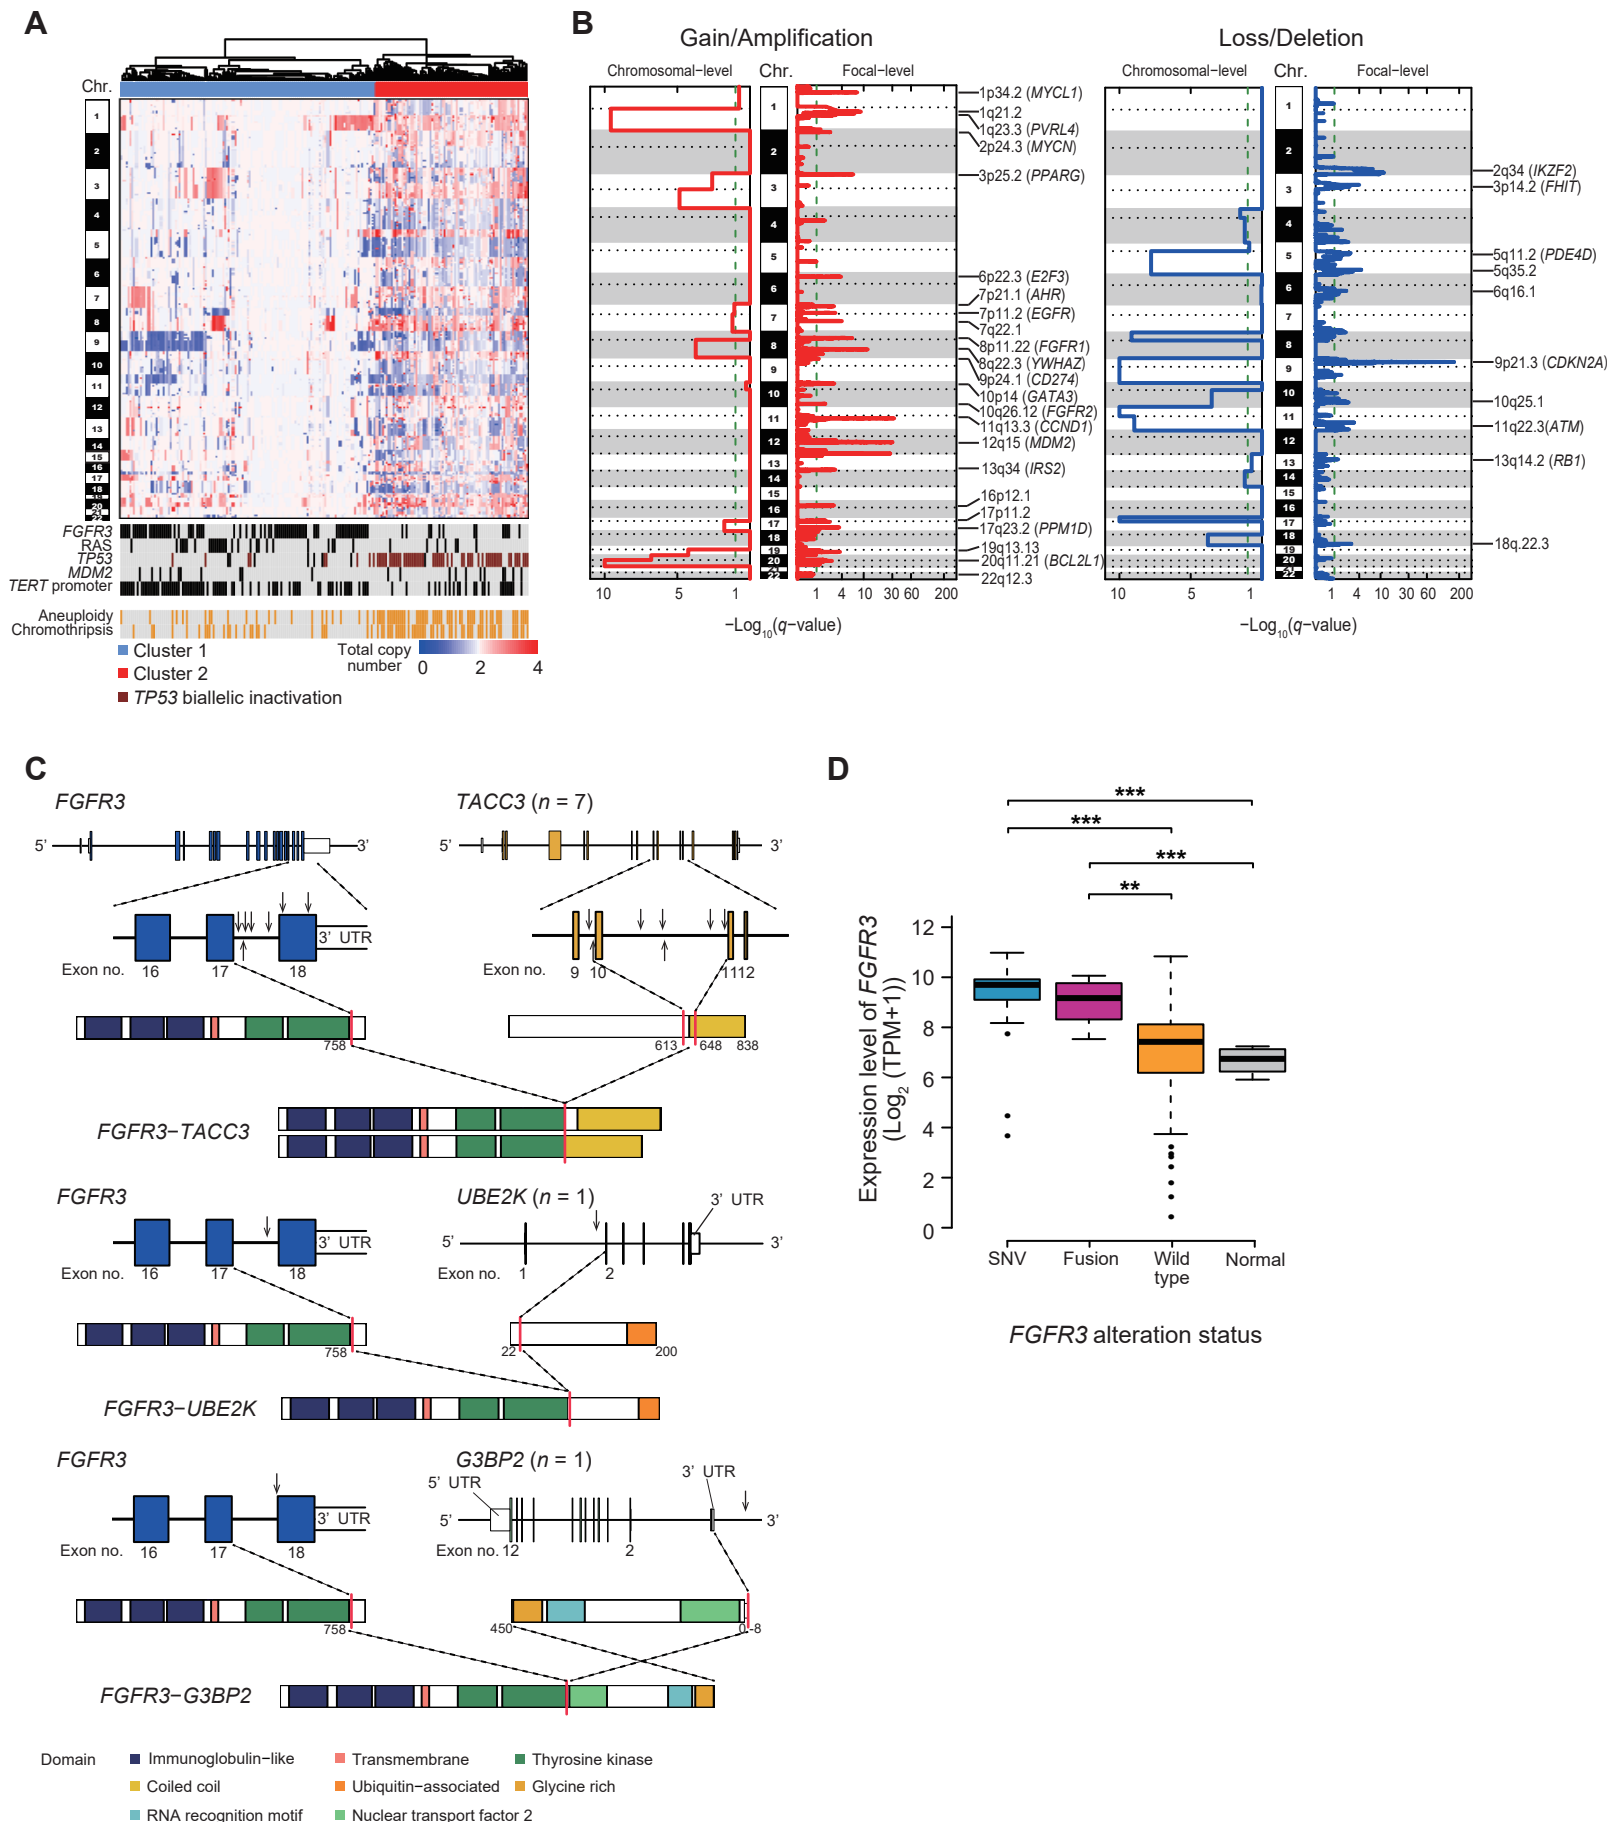

**Figure S2, related to Figure 1. Copy number alterations and fusion genes in UTUC.**

**(A)** Color-gradient maps of copy number alterations determined by SNP array karyotyping for 199 UTUC samples.

**(B)** Significant chromosomal- (left) and focal-level (right) copy number gain/amplification (red) and loss/deletion (blue) lesions detected by GISTIC 2.0. Putative target genes within the corresponding loci are indicated.

**(C)** Breakpoints in fusion genes of *FGFR3* and its partner genes and the resulting schematics of proteins. Arrows on the introns and exons of each gene represent breakpoints.

**(D)** Gene expression levels (RNA sequencing) of *FGFR3* in tumor samples with various status of alterations and in normal urothelial epithelia samples. *P* values calculated by two-sided Mann Whitney *U* test and Bonferroni corrected. The median, first and third quartiles, as well as outliers, are indicated with whiskers extending to the furthest value within 1.5 of the interquartile range. SNV, single nucleotide variant. \*\**P* < 0.01, \*\*\**P* < 0.001.

**Figure S3**

**A**

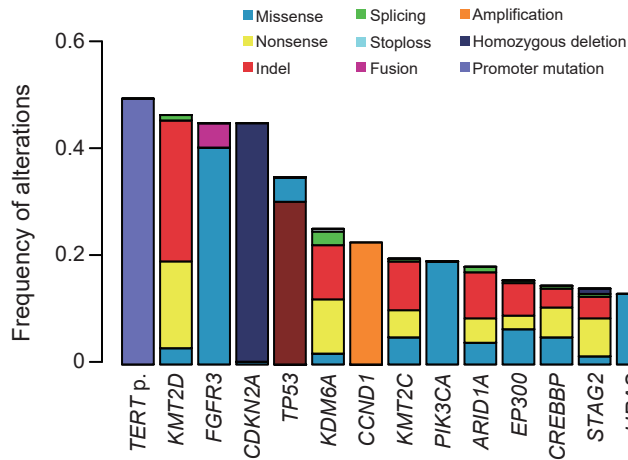

**B**

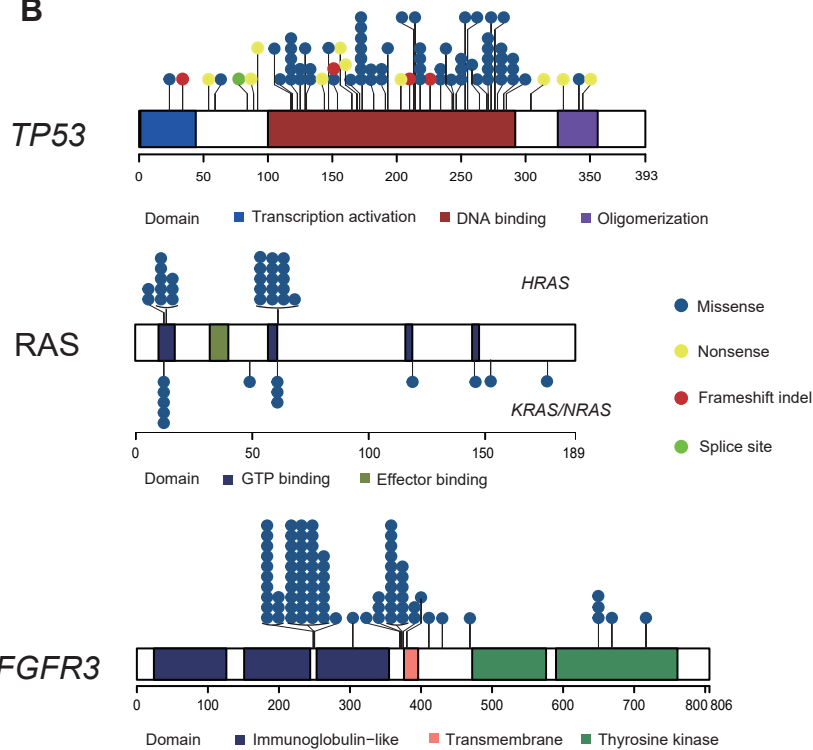

**C**

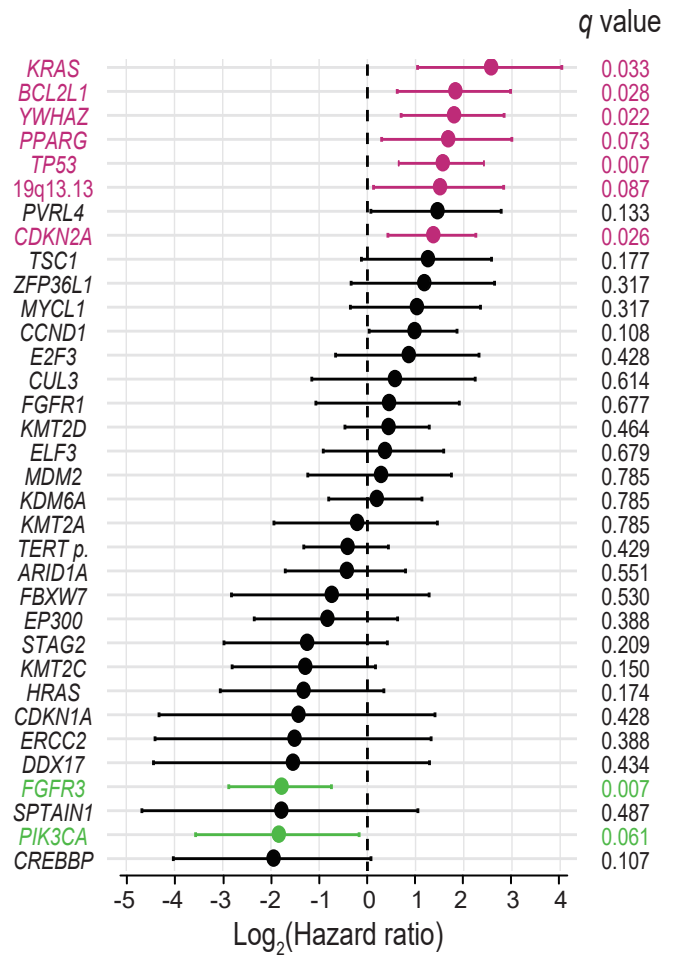

**D**

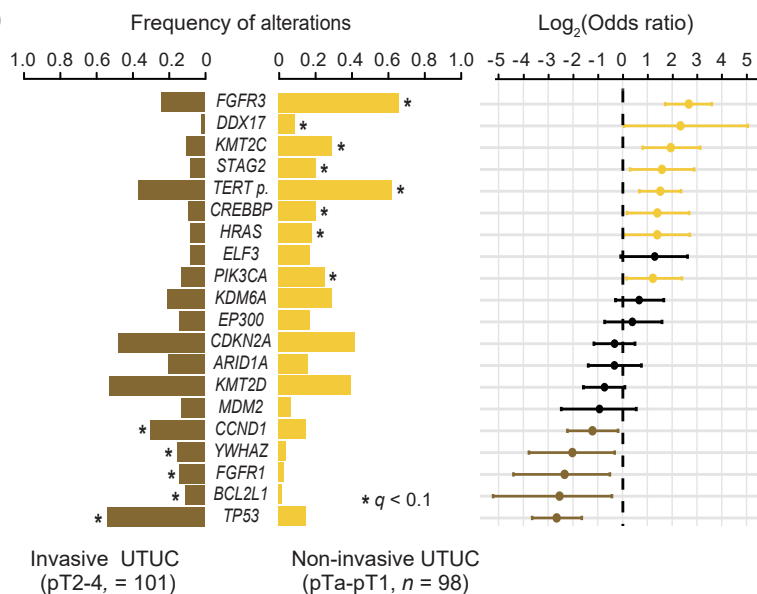

**E**

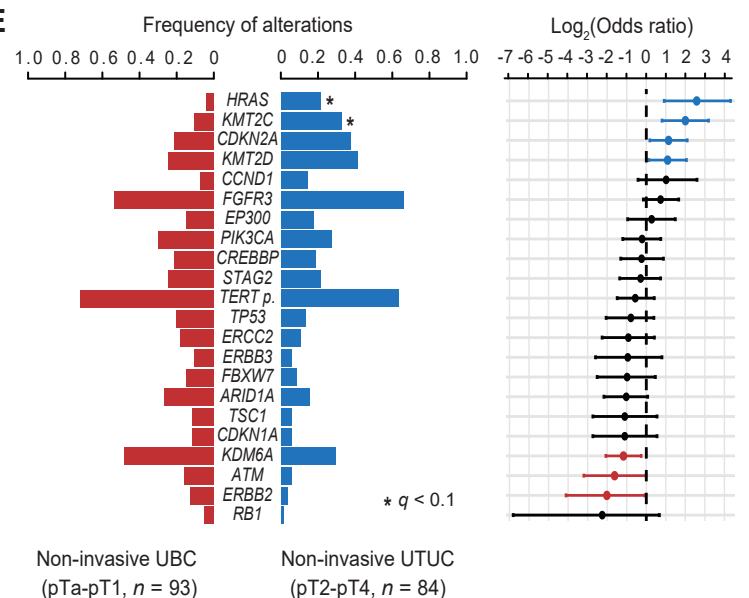

**Figure S3, related to Figure 1. Frequently altered driver genes in UTUC.**

**(A)** Bar plots showing frequently altered genes (in > 10% of the entire cohort) in this study. Non-pathogenic mutations are also included.

**(B)** Mutation distributions for *TP53* (top), *HRAS/KRAS/NRAS* (middle), and *FGFR3* (bottom).

**(C)** Forest plots showing hazard ratios and corresponding  $q$  values (Exact Log-rank Test with Benjamini-Hochberg adjustment) by univariate analysis of driver gene alterations on disease-specific survival. Positively and negatively significant genes ( $q < 0.1$ ) are shown in purple and green, respectively.

**(D and E)** Comparisons of frequency of common genetic lesions (left) between non-invasive ( $n = 98$ ) vs. invasive UTUC ( $n = 101$ ) **(D)** and non-invasive UBC ( $n = 93$ ) vs. UTUC ( $n = 84$ ) **(E)**.  $\text{Log}_2$ -transformed odds ratios are also shown with 95% confidence intervals (right). Significant enrichment is shown by asterisks ( $q < 0.1$ , two-sided Fisher' s exact test with Benjamini-Hochberg adjustment for multiple testing) in **(D)** and **(E)**.

*TERT* p., *TERT* promoter.

**Figure S4**

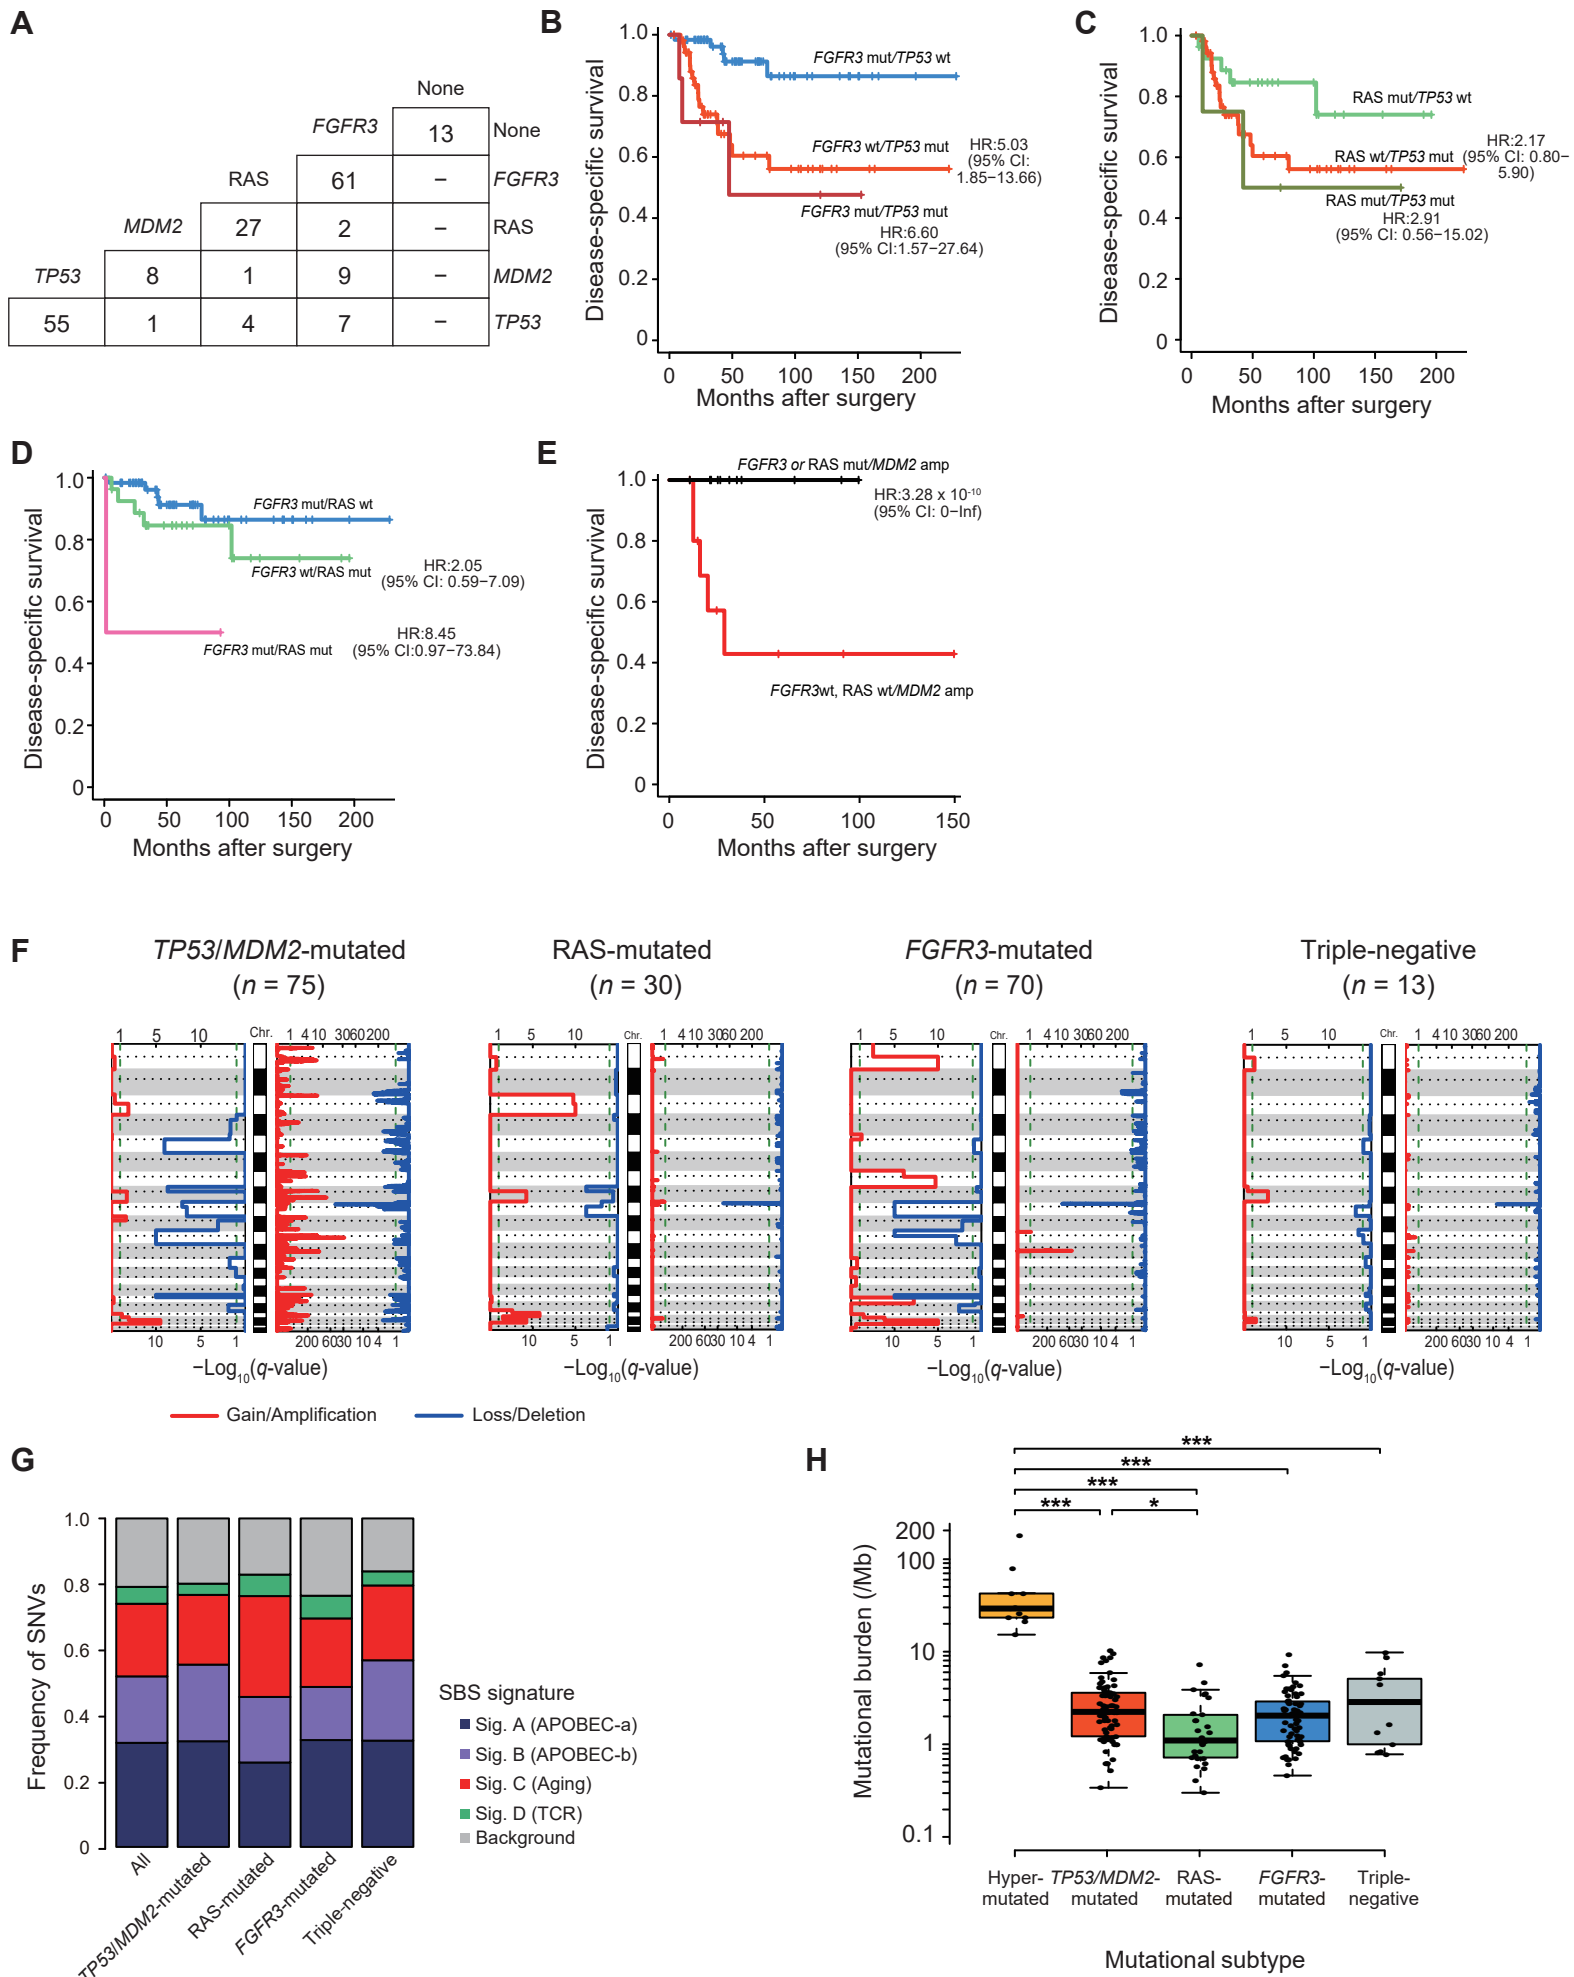



**Figure S4, related to Figures 2 and 3. Clinical effects of combinations of subtype-defining genetic alterations.**

**(A)** Genetic status of subtype-defining genes; *TP53*, *MDM2*, *RAS*, and *FGFR3*. Numbers of samples with alterations in these genes are shown in cross section.

**(B–D)** Disease-specific survival for samples harboring at least one mutation in *TP53* and *FGFR3* **(B)**, *TP53* and *RAS* **(C)**, and *RAS* and *FGFR3* **(D)**.

**(E)** Disease-specific survival for samples harboring *MDM2* amplification with and without *FGFR3/RAS* mutation.

**(F)** Significant arm- and focal-level CNAs in the *TP53/MDM2*-, *RAS*-, *FGFR3*-mutated, and triple negative subtypes.

**(G)** Bar plots showing the frequency of each single base substitution (SBS) signature in each mutational subtype. SNV, single nucleotide variant.

**(H)** Log-scaled mutational burden of each mutational subtype of UTUC. *P* values calculated by two-sided Mann-Whitney *U* test with Bonferroni correction. \* *P* < 0.05, \*\* *P* < 0.01, \*\*\* *P* < 0.001.

Hazard ratios (HRs) and 95% confidence intervals (CIs) calculated by Cox proportional-hazards model in **(B)–(E)**.

**Figure S5**

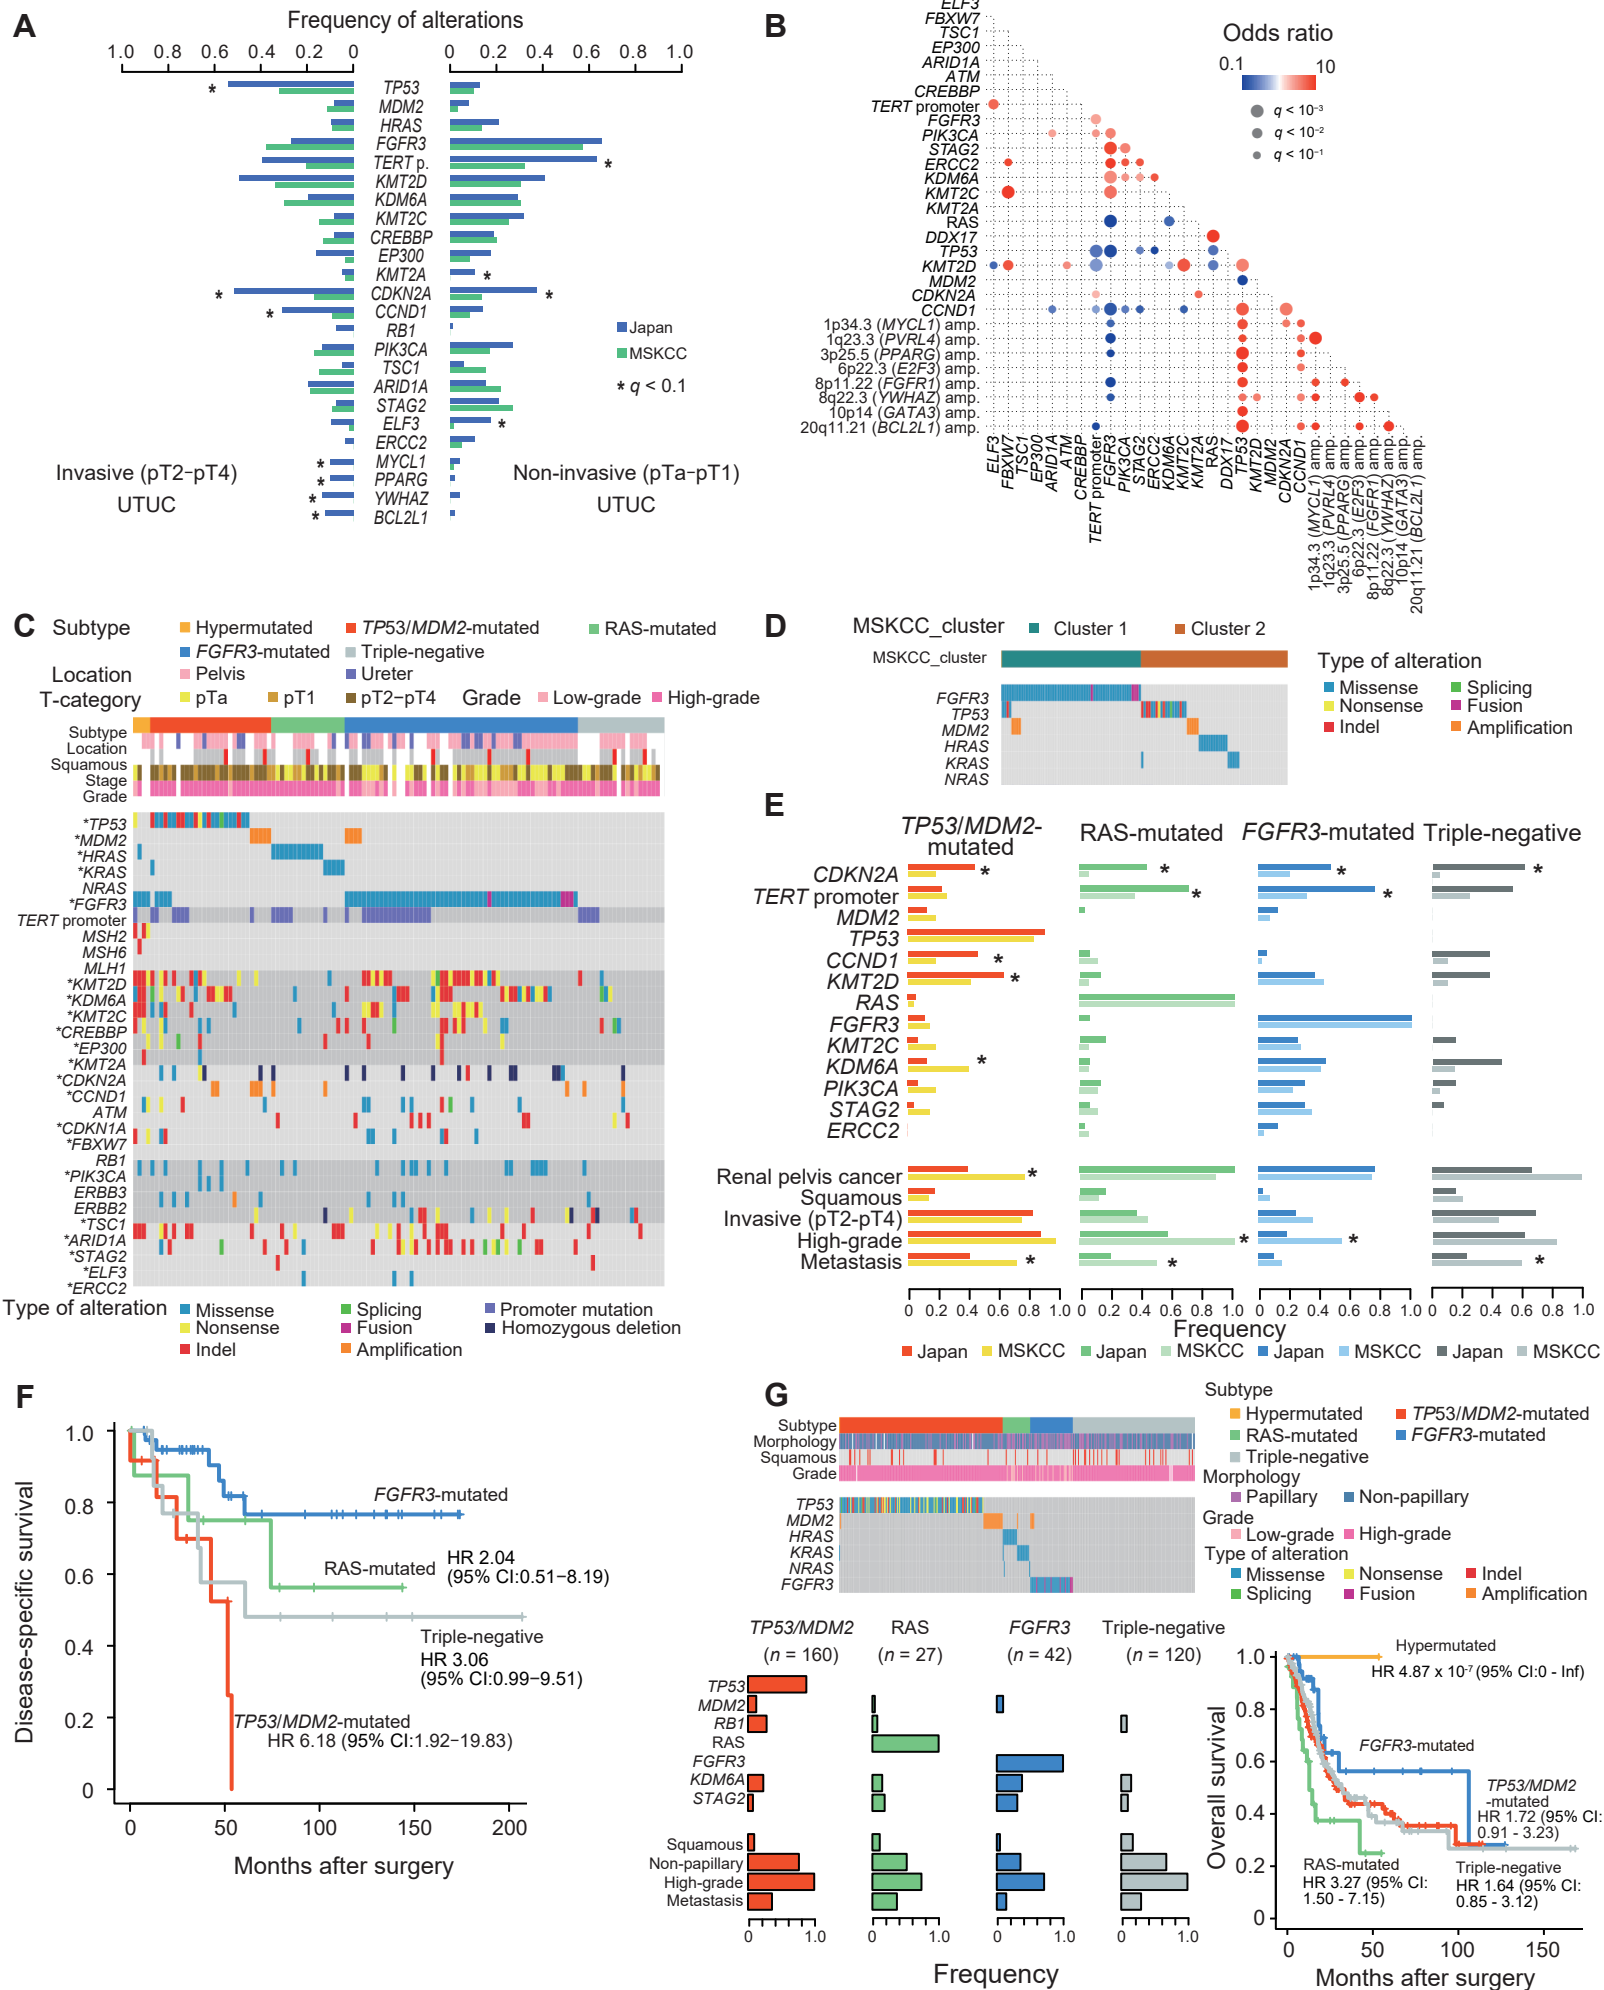

**Figure S5, related to Figure 3. Validation study in the MSKCC UTUC and TCGA UBC cohort.**

**(A)** Comparisons of frequency of common genetic lesions in invasive (left) and non-invasive (right) UTUC between our (blue) and MSKCC (green) cohort. Significant enrichment is shown by asterisks ( $q < 0.1$ , two-sided Fisher' s exact test with Benjamini-Hochberg adjustment for multiple testing). *TERT* p., *TERT* promoter.

**(B)** Statistically significant ( $q < 0.1$ , pairwise Fisher' s exact test with Benjamini-Hochberg adjustment) positive (red) and negative (blue) correlations of major genetic events in the combined data of our and MSKCC UTUC cohort.

**(C)** Landscape of somatic alterations in MSKCC UTUC cohort, which are grouped into five discrete subtypes when they are analyzed with the Japanese cohort. Significantly altered and/or positively selected driver genes in the Japanese cohort are indicated by asterisks.

**(D)** Clustering analysis of the non-hypermuted MSKCC UTUC cases alone.

**(E)** Frequencies of common genetic lesions and clinical/histological features across four non-hypermuted subtypes in our and MSKCC UTUC cohort. Significant enrichment is shown by asterisks ( $P < 0.05$ , two-sided Fisher' s exact test).

**(F)** Disease-specific survival of four subtypes in MSKCC UTUC cohort.

**(G)** Landscape of somatic alterations (top), frequencies of common genetic lesions and clinical/histological features across four non-hypermuted subtypes (bottom left), and overall survival of five subtypes (bottom right) in the TCGA UBC cohort.

Hazard ratios (HRs) and 95% confidence intervals (CIs) calculated by Cox proportional-hazards model in **(F)** and **(G)**.

MSKCC, Memorial Sloan Kettering Cancer Center.

**Figure S6**

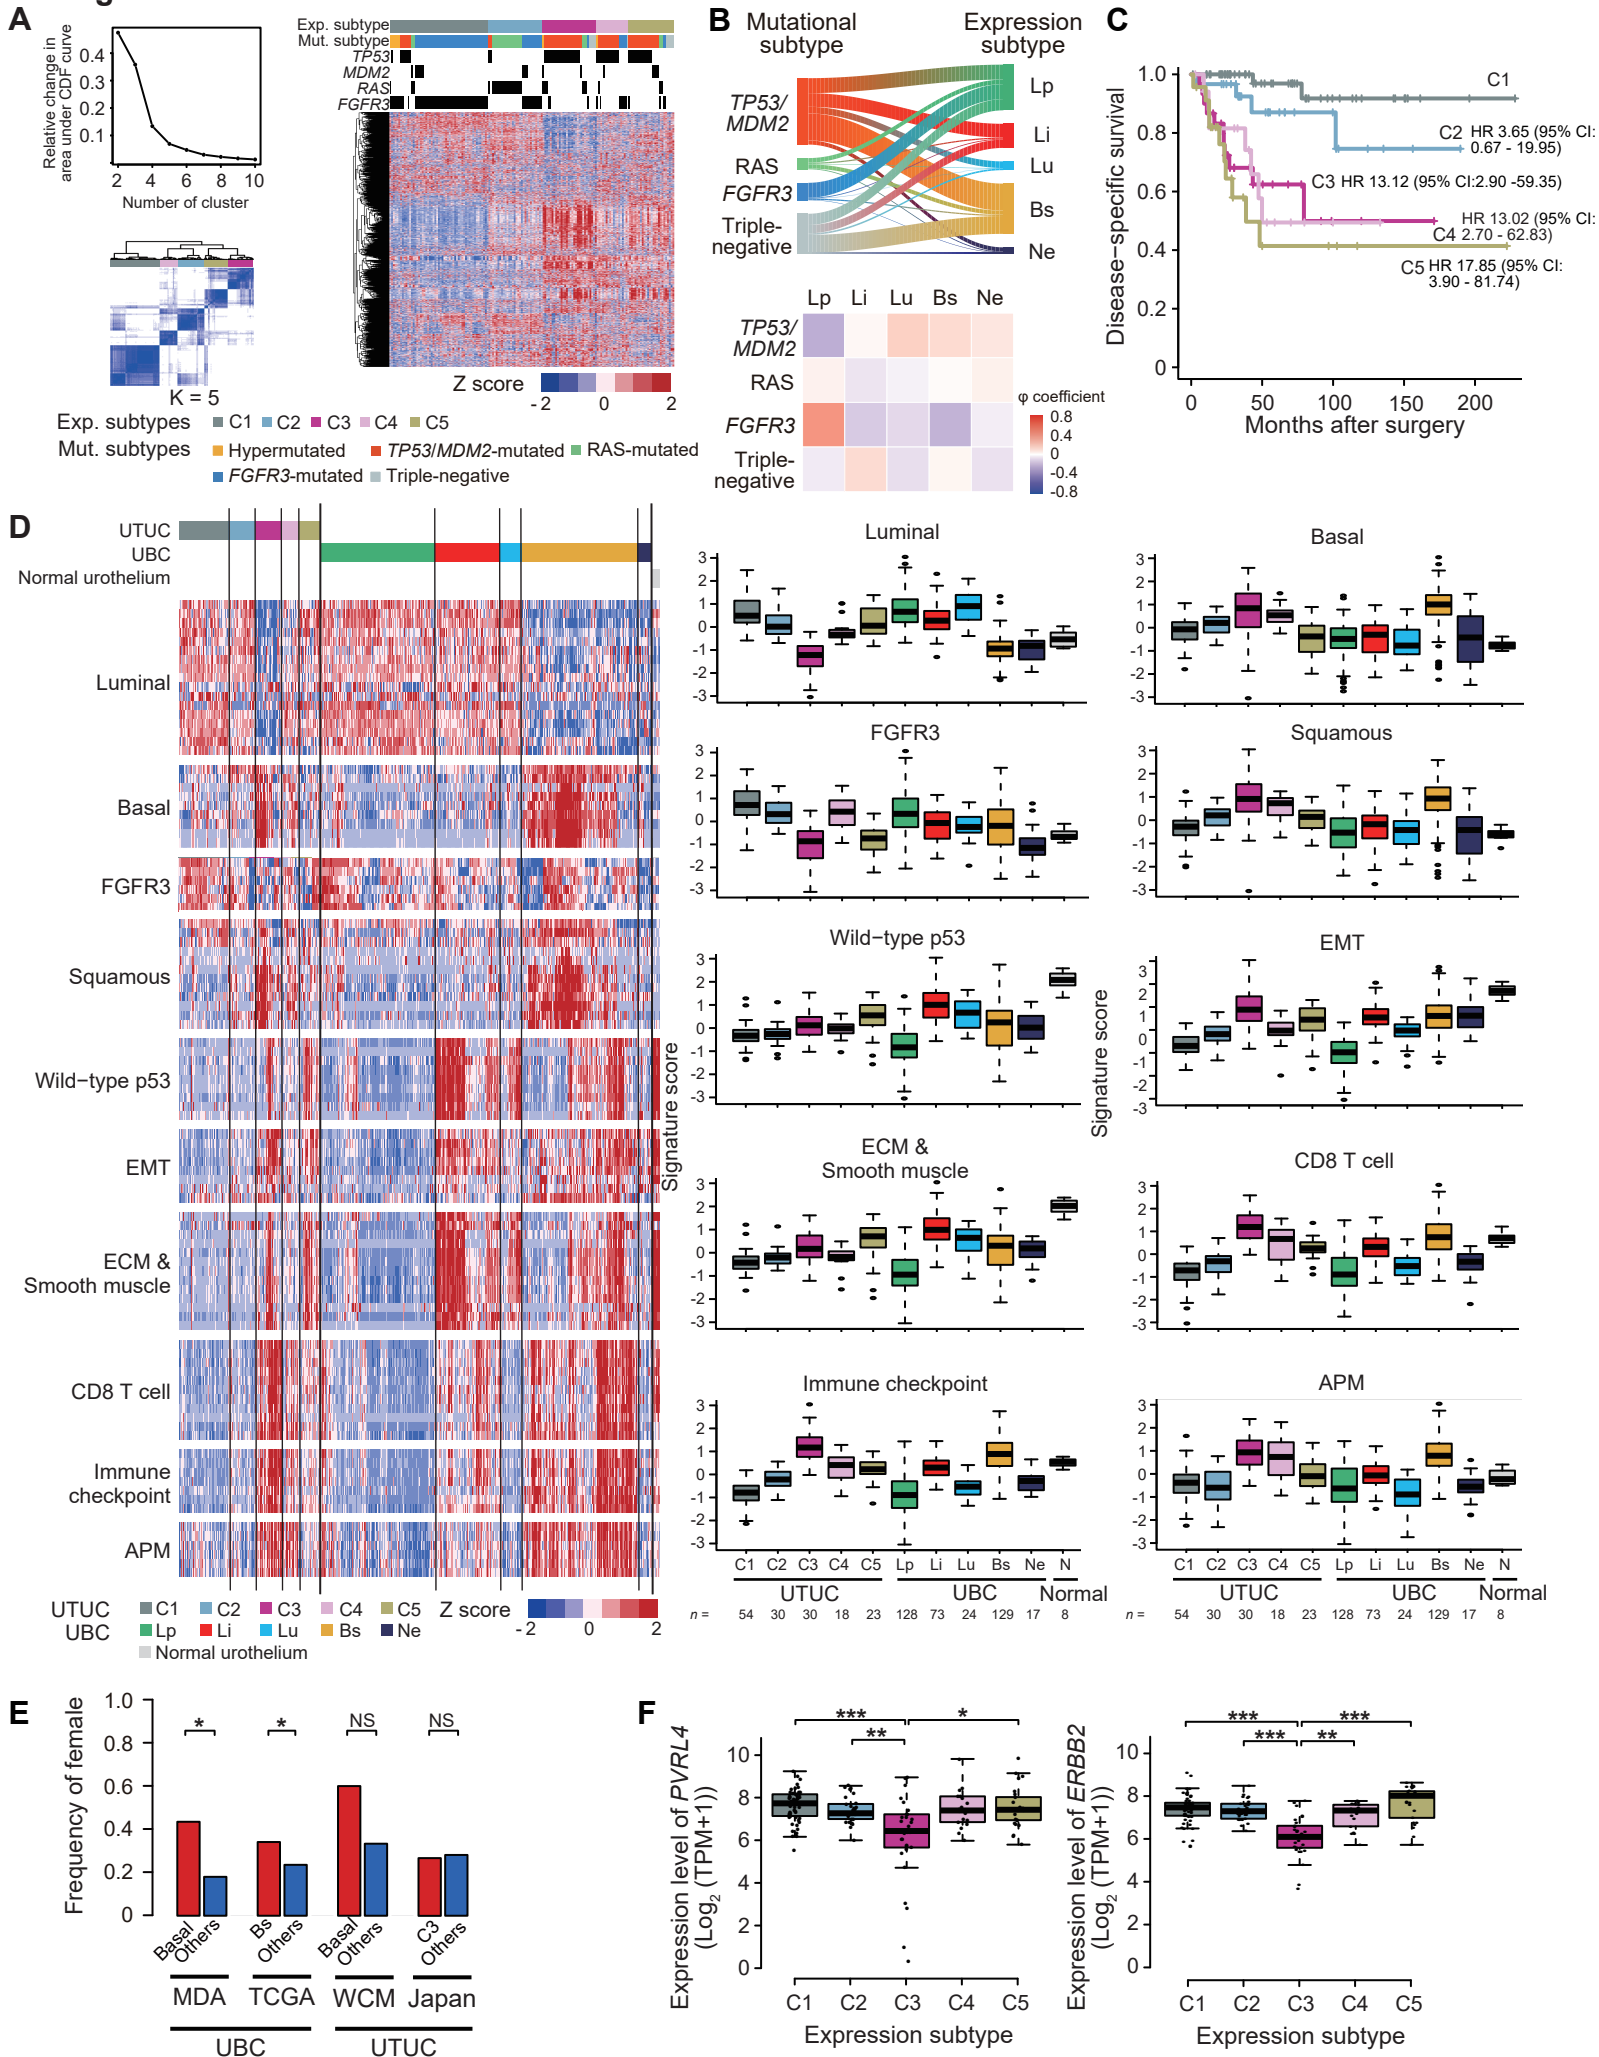

**Figure S6, related to Figures 4 and 5. Expression subtypes in UTUC.**

**(A)** Consensus clustering of gene expression data of in 158 UTUC samples using 2,000 most variably expressed genes. Delta area plot and consensus matrix of  $K = 5$  (left) and integrated view of expression clustering combined with mutational subtypes, *TP53*, *MDM2*, *RAS*, and *FGFR3* mutations (right) are shown.

**(B)** Correlations between mutational and expression subtypes (left) and heatmap of Phi coefficients (right) in the TCGA UBC cohort.

**(C)** Disease-specific survival for different expression subtypes. Hazard ratios (HRs) and 95% confidence intervals (CIs) calculated by Cox proportional-hazards model.

**(D)** Heatmap showing expression level of biologically important signatures in UTUC expression subgroup, UBC subgroup (TCGA), and normal urothelial epithelia samples (left) and box plots of the normalized expression scores for each signature (right). Genes in each signature are in the same order as **Figure 4C**. The median, first and third quartiles, as well as outliers, are indicated with whiskers extending to the furthest value within 1.5 of the interquartile range in box plots. EMT, epithelial mesenchymal transition; ECM, extracellular matrix; APM, antigen presentation machinery.

**(E)** Bar plots showing the frequency of female in basal-like and other subtypes in the previous UBC and UTUC studies. MDA, MD Anderson Cancer Center; WCM, Weill Cornell Medicine.  $P$  values calculated by two-sided Fisher's exact test. \* $P < 0.05$ ; NS, not significant.

**(F)** Gene expression levels (RNA sequencing) of *PVRL4* and *ERBB2* in each expression subtype.  $P$  values calculated by two-sided Mann Whitney  $U$  test and Bonferroni corrected. The median, first and third quartiles, as well as outliers, are indicated with whiskers extending to the furthest value within 1.5 of the interquartile range. \* $P < 0.05$ , \*\* $P < 0.01$ , \*\*\* $P < 0.001$ .

Lp, luminal-papillary; Li, luminal-infiltrated; Lu, luminal; Bs, basal-squamous; Ne, neuronal.

**Table S5, related to Figure 4. Genes involved in each expression signature.**

| Luminal       | Basal        | FGFR3          | Squamous      | Wild-type p53 | EMT           | ECM & smooth muscle | CD 8 T cell   | Immune checkpoint | APM          | F-TBRS          |
|---------------|--------------|----------------|---------------|---------------|---------------|---------------------|---------------|-------------------|--------------|-----------------|
| <i>FGFR3</i>  | <i>KRT1</i>  | <i>FGFR3</i>   | <i>DSC3</i>   | <i>ACTG2</i>  | <i>ZEB1</i>   | <i>PGM5</i>         | <i>CD8A</i>   | <i>CD274</i>      | <i>HLA-A</i> | <i>ACTA2</i>    |
| <i>FOXA1</i>  | <i>CD44</i>  | <i>TP63</i>    | <i>GSDMC</i>  | <i>CNN1</i>   | <i>ZEB2</i>   | <i>DES</i>          | <i>GZMA</i>   | <i>PDCD1LG2</i>   | <i>B2M</i>   | <i>COL4A1</i>   |
| <i>GPX2</i>   | <i>CDH3</i>  | <i>IRS1</i>    | <i>TGM1</i>   | <i>MYH11</i>  | <i>SNAI1</i>  | <i>C7</i>           | <i>GZMB</i>   | <i>CTLA4</i>      | <i>HLA-C</i> | <i>TAGLN</i>    |
| <i>CYP2J2</i> | <i>KRT14</i> | <i>SEMA4B</i>  | <i>PI3</i>    | <i>MFAP4</i>  | <i>TWIST1</i> | <i>SFRP4</i>        | <i>GZMH</i>   | <i>PDCD1</i>      | <i>HLA-B</i> | <i>SH3PXD2A</i> |
| <i>PPARG</i>  | <i>KRT16</i> | <i>PTPN13</i>  | <i>TP63</i>   | <i>PGM5</i>   | <i>CDH2</i>   | <i>COMP</i>         | <i>GZMK</i>   | <i>LAG3</i>       | <i>TAP1</i>  |                 |
| <i>KRT7</i>   | <i>KRT5</i>  | <i>TMPRSS4</i> | <i>DSC1</i>   | <i>FLNC</i>   | <i>VIM</i>    | <i>SGCD</i>         | <i>GZMM</i>   | <i>HAVCR2</i>     | <i>TAP2</i>  |                 |
| <i>FABP4</i>  | <i>KRT6A</i> |                | <i>DSC2</i>   | <i>ACTC1</i>  | <i>FOXC2</i>  | <i>CNN1</i>         | <i>PRF1</i>   | <i>TIGIT</i>      |              |                 |
| <i>KRT18</i>  | <i>KRT6B</i> |                | <i>DSG1</i>   | <i>DES</i>    | <i>SNAI2</i>  | <i>SYNM</i>         | <i>CXCL9</i>  |                   |              |                 |
| <i>KRT19</i>  | <i>KRT6C</i> |                | <i>DSG2</i>   | <i>PCP4</i>   |               | <i>ACTG2</i>        | <i>CXCL10</i> |                   |              |                 |
| <i>KRT20</i>  |              |                | <i>DSG3</i>   |               |               | <i>ACTC1</i>        | <i>TBX21</i>  |                   |              |                 |
| <i>KRT8</i>   |              |                | <i>S100A7</i> |               |               | <i>ACTA2</i>        | <i>IFNG</i>   |                   |              |                 |
| <i>XPB1</i>   |              |                | <i>S100A8</i> |               |               | <i>MYL9</i>         |               |                   |              |                 |
| <i>UPK1A</i>  |              |                |               |               |               | <i>MYLH11</i>       |               |                   |              |                 |
| <i>UPK2</i>   |              |                |               |               |               | <i>TAGLN</i>        |               |                   |              |                 |
| <i>ERBB2</i>  |              |                |               |               |               |                     |               |                   |              |                 |
| <i>ERBB3</i>  |              |                |               |               |               |                     |               |                   |              |                 |
| <i>GATA3</i>  |              |                |               |               |               |                     |               |                   |              |                 |

EMT, epithelial-mesenchymal transition; ECM, extracellular matrix; APM, antigen presentation machinery; F-TBRS, pan-fibroblast TGF $\beta$  response signature.

**Figure S7**

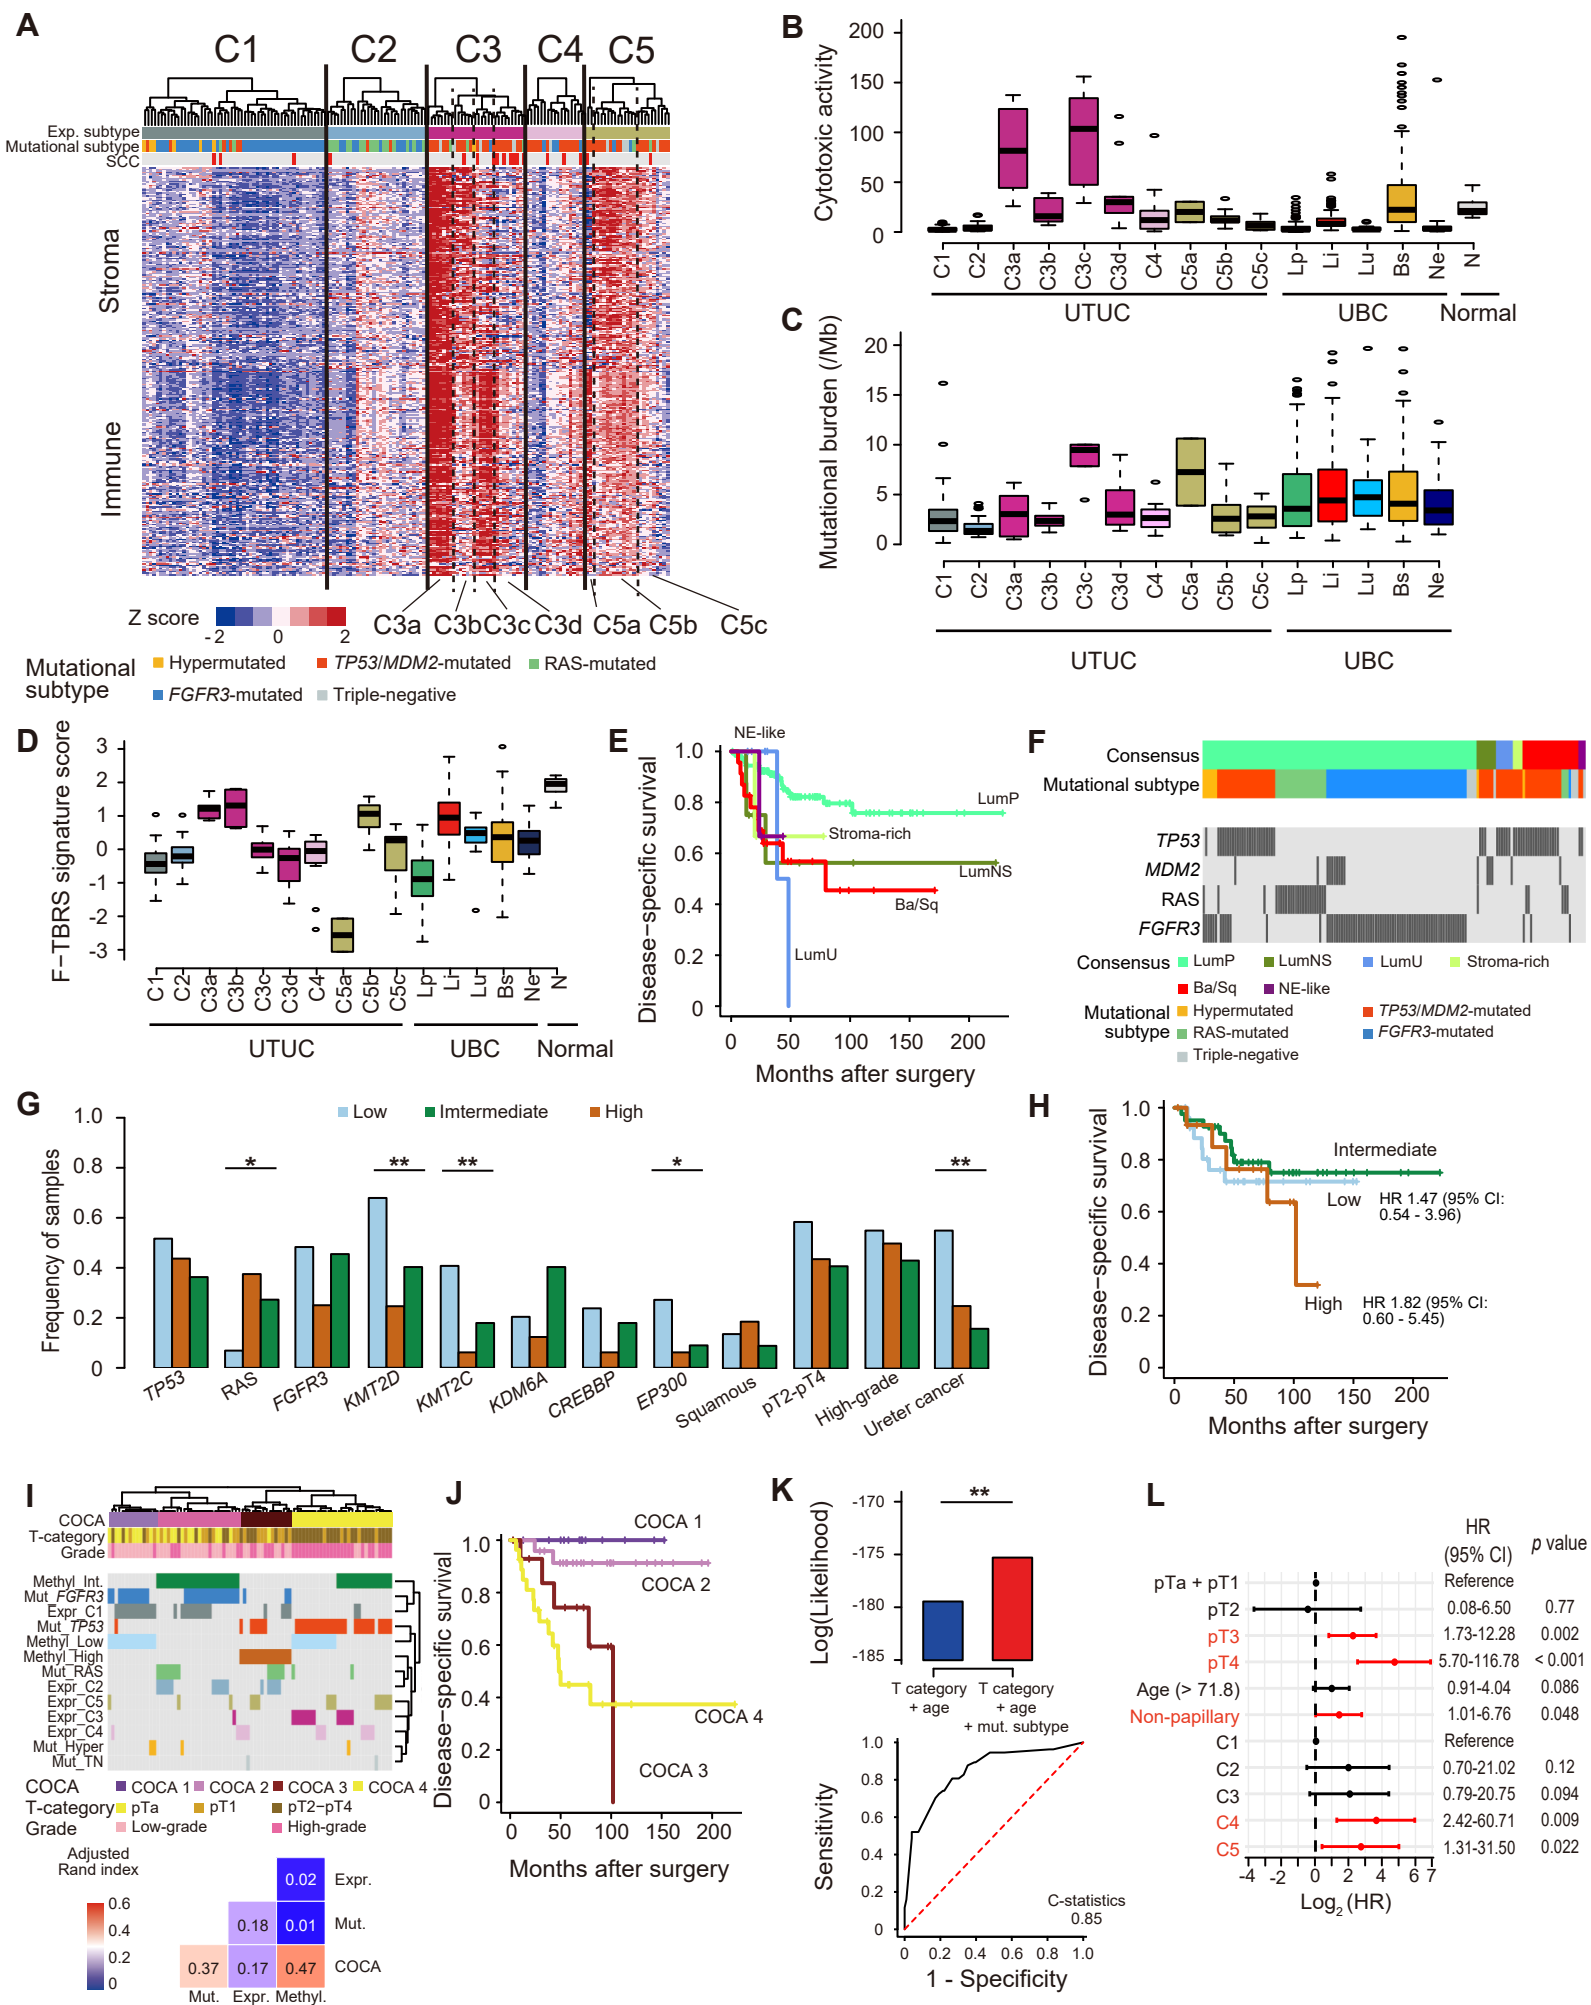

**Figure S7, related to Figures 4 and 5. Tumor microenvironment and methylation profile in UTUC.**

**(A)** Heatmap showing immune and stromal expression profiles in five UTUC expression subgroups. Samples with C3 and C5 are further clustered into four and three small subclusters (C3a-d and C5a-c), respectively.

**(B-D)** Box plots showing the cytotoxic activity **(B)**, mutational burden **(C)**, and F-TBRS score **(D)** for each UTUC subgroup, UBC subgroup, and normal urothelial epithelia samples. The median, first and third quartiles, as well as outliers, are indicated with whiskers extending to the furthest value within 1.5 of the interquartile range. Lp, luminal-papillary; Li, luminal-infiltrated; Lu, luminal; Bs, basal-squamous; Ne, neuronal; UBC, urothelial bladder carcinoma; F-TBRS, pan fibroblast TGF $\beta$  response signature.

**(E)** Disease-specific survival for patients in each consensus subtype.

**(F)** Mutational subtypes and alteration of subtype-defying genes in each consensus subtype. LumP, Luminal Papillary; LumNS, Luminal Non-specified; LumU, Luminal Unstable; Ba/Sq, basal/Squamous; NE-like, neuroendocrine-like in **(E)** and **(F)**.

**(G)** Bar plots showing the frequencies of mutations in *TP53*, *RAS*, *FGFR3*, and chromatin modification genes as well as histopathological features in each methylation subtype. The frequencies were compared between CIMP and non-CIMP subtypes by two-sided Fisher's exact test. \* $P < 0.05$ , \*\* $P < 0.01$ .

**(H)** Disease-specific survival for patients in each methylation subtype. Hazard ratios (HRs) and 95% confidence intervals (CIs) calculated by Cox proportional-hazards model.

**(I)** Four clusters identified by cluster of cluster assignments analysis (top) and heatmap of adjusted Rand index between COCA, mutational, expression, and methylation subtypes (bottom). Mut., mutational subtypes; Expr., expression subtypes; Methyl., methylation subtypes.

**(J)** Disease-specific survival for patients in each COCA cluster.

**(K)** Bar plots showing the log likelihood values of two survival models (top) and ROC analysis for the prediction of disease-specific survival in the MSKCC UTUC cohort (bottom). \*\* $P < 0.01$ . Mut. subtype, mutational subtype.

**(L)** HRs with 95% CIs for covariates significantly included in Cox proportional-hazards modeling of disease-specific survival. Factors that were significantly associated with disease-specific survival are



**Figure S8**

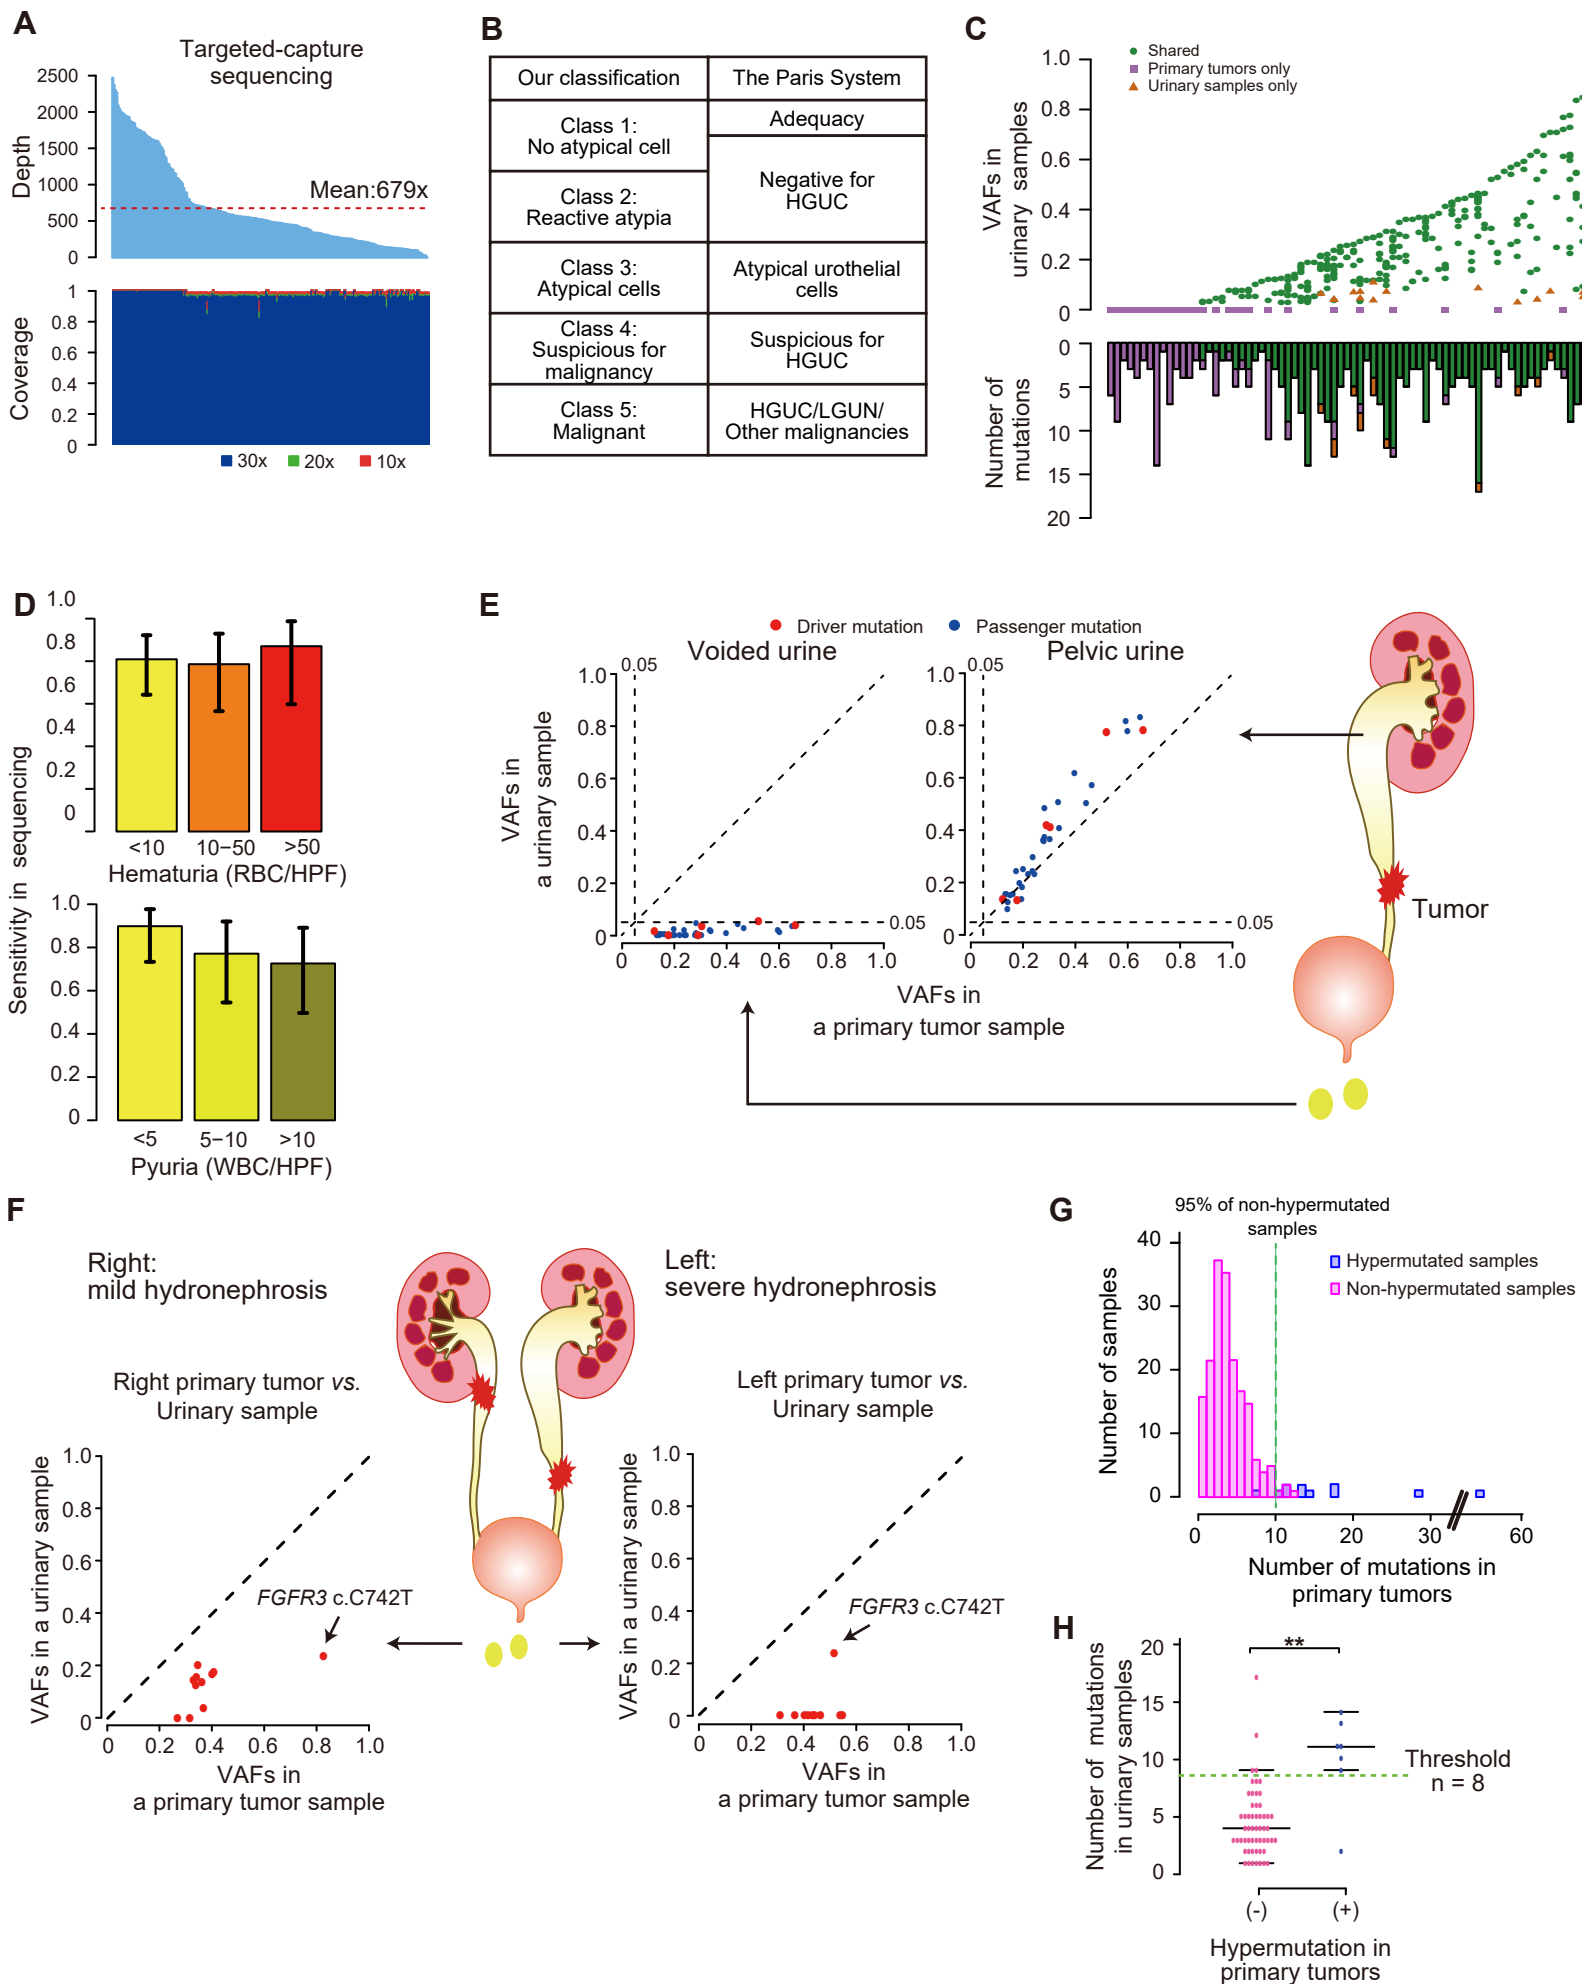

**Figure S8, related to Figure 6. Urinary sediment-derived DNA sequencing.**

**(A)** Bar plots showing depth (top) and coverage (bottom) of targeted-capture sequencing.

**(B)** A table showing correspondence of urinary cytology criteria in our institution classification and the Paris System. HGUC, high grade urothelial carcinoma; LGUN, low grade urothelial neoplasia.

**(C)** VAFs of mutations in urinary samples (top) and numbers of mutations (bottom) in primary tumors and/or urinary samples. Mutations shared by primary tumors and urinary samples, detected only in primary tumors, and only in urinary samples are shown in different colors.

**(D)** Bar plots with 95% confidence interval error bars indicating sensitivity of sequencing by the severity of hematuria (top) and pyuria (bottom).

**(E)** Diagonal plots of variant allele frequencies between mutations detected in the primary tumor and corresponding preoperative urinary sediment samples obtained from voided urine (left) or pre-obstructive pelvic urine (middle) in a case with severe hydronephrosis (UTUC203), as shown in the right schema.

**(F)** Comparisons of VAFs between primary tumors and preoperative urinary sediment in a case with bilateral tumor-induced hydronephrosis with different severities as shown in the schema (UTUC260). Note that left and right tumor shared no mutation except for *FGFR3* c.C742T.

**(G)** A histogram of numbers of mutations in the 30 panel genes detected by whole exome sequencing in non-hypermutated (pink) and hypermutated (blue) samples.

**(H)** Numbers of mutations detected in urinary sediment samples in non-hypermutated (pink) and hypermutated (blue) samples. A threshold of hyper- and non-hypermutated (green) and the median, first and third quartile (black) are indicated. *P* value calculated by two-sided Mann-Whitney *U* test. \*\**P* < 0.01.

VAF, variant allele frequency.

Table S6, related to Figure 6. Patients' backgrounds of urinary sediment-derived DNA sequencing.

| Characteristics           | Entire cohort<br>(n = 199) | Preoperative urine samples |                                |                               |                                | Postoperative urine samples |                                |                               |                                |
|---------------------------|----------------------------|----------------------------|--------------------------------|-------------------------------|--------------------------------|-----------------------------|--------------------------------|-------------------------------|--------------------------------|
|                           |                            | Primary cohort<br>(n = 41) | P-value<br>(vs. entire cohort) | Validation cohort<br>(n = 32) | P-value<br>(vs. entire cohort) | Primary cohort<br>(n = 25)  | P-value<br>(vs. entire cohort) | Validation cohort<br>(n = 12) | P-value<br>(vs. entire cohort) |
| <b>Sex</b>                |                            |                            |                                |                               |                                |                             |                                |                               |                                |
| Male                      | 139                        | 31                         |                                | 22                            |                                | 16                          |                                | 8                             |                                |
| Female                    | 60                         | 10                         | 0.57                           | 10                            | 1.00                           | 9                           | 0.65                           | 4                             | 0.76                           |
| <b>T-category</b>         |                            |                            |                                |                               |                                |                             |                                |                               |                                |
| Ta                        | 50                         | 9                          |                                | 8                             |                                | 4                           |                                | 3                             |                                |
| T1                        | 49                         | 11                         |                                | 8                             |                                | 8                           |                                | 1                             |                                |
| T2                        | 13                         | 3                          |                                | 2                             |                                | 1                           |                                | 1                             |                                |
| T3                        | 80                         | 17                         |                                | 12                            |                                | 11                          |                                | 7                             |                                |
| T4                        | 7                          | 1                          | 0.98                           | 2                             | 0.93                           | 1                           | 0.93                           | 0                             | 0.63                           |
| <b>Grade</b>              |                            |                            |                                |                               |                                |                             |                                |                               |                                |
| Low                       | 90                         | 13                         |                                | 9                             |                                | 10                          |                                | 5                             |                                |
| High                      | 109                        | 28                         | 0.12                           | 23                            | 0.08                           | 15                          | 0.67                           | 7                             | 1.00                           |
| <b>Location</b>           |                            |                            |                                |                               |                                |                             |                                |                               |                                |
| Pelvis                    | 123                        | 24                         |                                | 19                            |                                | 15                          |                                | 5                             |                                |
| Ureter                    | 65                         | 16                         |                                | 13                            |                                | 9                           |                                | 7                             |                                |
| Unknown                   | 11                         | 1                          | 0.67                           | 0                             | 0.40                           | 1                           | 0.93                           | 0                             | 0.22                           |
| <b>Squamous</b>           |                            |                            |                                |                               |                                |                             |                                |                               |                                |
| positive                  | 23                         | 3                          |                                | 1                             |                                | 1                           |                                | 1                             |                                |
| negative                  | 176                        | 38                         | 0.58                           | 31                            | 0.21                           | 24                          | 0.49                           | 11                            | 1.00                           |
| <b>Mutational subtype</b> |                            |                            |                                |                               |                                |                             |                                |                               |                                |
| Hypermutated              | 11                         | 2                          |                                | 5                             |                                | 1                           |                                | 1                             |                                |
| TP53/MDM2-mutated         | 75                         | 17                         |                                | 13                            |                                | 11                          |                                | 5                             |                                |
| RAS-mutated               | 30                         | 3                          |                                | 3                             |                                | 0                           |                                | 3                             |                                |
| FGFR3-mutated             | 70                         | 14                         |                                | 11                            |                                | 10                          |                                | 2                             |                                |
| Triple-negative           | 13                         | 5                          | 0.53                           | 0                             | 0.18                           | 3                           | 0.16                           | 1                             | 0.50                           |

P values calculated by two-sided Fisher's exact test.

Table S8, related to Figure 6. Summary of urinary sediment-derived DNA sequencing and urinary cytology.

| Cohort                         | Cancer detection           |                       |                            |                       | Mutation detection                |                       | Focal CNA detection               |                       |
|--------------------------------|----------------------------|-----------------------|----------------------------|-----------------------|-----------------------------------|-----------------------|-----------------------------------|-----------------------|
|                                | Sequencing                 |                       | Cytology                   |                       | Number of mutations (Urine/Tumor) | Sensitivity (95% CI)  | Number of mutations (Urine/Tumor) | Sensitivity (95% CI)  |
|                                | Number of positive samples | Sensitivity (95% CI)  | Number of positive samples | Sensitivity (95% CI)  |                                   |                       |                                   |                       |
| Primary cohort                 | 32/41                      | 78.0%<br>(62.4-89.4%) | 12/41                      | 29.3%<br>(16.1-45.5%) | 136/203                           | 67.0%<br>(60.1-73.4%) | 26/27                             | 96.3%<br>(81.0-99.9%) |
| Validation cohort              | 28/32                      | 87.5%<br>(71.0-96.5%) | 12/32                      | 37.5%<br>(21.1-56.3%) | 147/177                           | 83.1%<br>(76.7-88.3%) | 23/31                             | 74.2%<br>(55.4-88.1%) |
| All                            | 60/73                      | 82.2%<br>(71.5-90.2%) | 24/73                      | 32.9%<br>(22.3-44.9%) | 283/380                           | 74.5%<br>(69.8-78.8%) | 49/58                             | 84.5%<br>(72.6-92.7%) |
| Non-urothelial cancer patients | 0/18                       | 0%<br>(0-18.5%)       | 2/18                       | 11.1%<br>(1.4%-34.7%) | —                                 | —                     | —                                 | —                     |

CNA, copy number alteration; CI, confidence interval.
